# Supplementary material
Source: publisher figshare collection journal article supplement (https://acs.figshare.com/ndownloader/files/13574579)
Supplement: Supplementary file 1 [file 13574579]

## Sheet: proteins
Protein IDs	Protein names	Gene names	Controlled experiments (0.22 ng HeLa protein) 1	Controlled experiments (0.22 ng HeLa protein) 2	Controlled experiments (0.22 ng HeLa protein) 3	Controlled experiments (4-HeLa cells) 1	Controlled experiments (4-HeLa cells) 2	Controlled experiments (4-HeLa cells) 3	Single Cell 1	Single Cell 2	Single Cell 3	Single Cell 4	Single Cell 5	Single Cell 6	Single Cell 7	Single Cell 8	Single Cell 9	Single Cell 10
A0A096LP55;P07919	Cytochrome b-c1 complex subunit 6;Cytochrome b-c1 complex subunit 6, mitochondrial	UQCRHL;UQCRH		By matching	By matching	By MS/MS	By matching
P62834;P61224;A6NIZ1	Ras-related protein Rap-1A;Ras-related protein Rap-1b;Ras-related protein Rap-1b-like protein	RAP1A;RAP1B				By MS/MS		By MS/MS
P11488;P63096;P19087;P09471;P08754;A8MTJ3;P04899;P38405;P63092;Q5JWF2	Guanine nucleotide-binding protein G(t) subunit alpha-1;Guanine nucleotide-binding protein G(i) subunit alpha-1;Guanine nucleotide-binding protein G(t) subunit alpha-2;Guanine nucleotide-binding protein G(o) subunit alpha;Guanine nucleotide-binding protein G(k) subunit alpha;Guanine nucleotide-binding protein G(t) subunit alpha-3;Guanine nucleotide-binding protein G(i) subunit alpha-2;Guanine nuc…	GNAT1;GNAI1;GNAT2;GNAO1;GNAI3;GNAT3;GNAI2;GNAL;GNAS	By matching	By matching	By matching		By MS/MS	By MS/MS	By matching									By matching
Q99613;B5ME19	Eukaryotic translation initiation factor 3 subunit C;Eukaryotic translation initiation factor 3 subunit C-like protein	EIF3C;EIF3CL		By matching	By matching	By MS/MS	By MS/MS
Q13765;E9PAV3;Q9BZK3	Nascent polypeptide-associated complex subunit alpha;Nascent polypeptide-associated complex subunit alpha, muscle-specific form	NACA	By matching	By matching	By matching	By MS/MS	By MS/MS	By MS/MS	By matching	By MS/MS	By matching	By matching	By matching		By matching	By matching	By MS/MS	By MS/MS
O00151	PDZ and LIM domain protein 1	PDLIM1	By matching		By matching	By matching	By matching	By matching							By matching		By MS/MS	By MS/MS
O00231	26S proteasome non-ATPase regulatory subunit 11	PSMD11	By matching	By matching	By matching	By MS/MS			By matching			By matching						By matching
O75610;O00292	Left-right determination factor 1;Left-right determination factor 2	LEFTY1;LEFTY2											By MS/MS
O00410	Importin-5	IPO5		By matching	By matching	By MS/MS	By MS/MS	By MS/MS
O00469	Procollagen-lysine,2-oxoglutarate 5-dioxygenase 2	PLOD2												By MS/MS
O00471	Exocyst complex component 5	EXOC5								By MS/MS			By matching			By matching
O00571;O15523	ATP-dependent RNA helicase DDX3X;ATP-dependent RNA helicase DDX3Y	DDX3X;DDX3Y	By MS/MS	By MS/MS	By matching	By MS/MS	By MS/MS	By MS/MS					By matching	By matching		By matching	By matching	By matching
P47813;O14602	Eukaryotic translation initiation factor 1A, X-chromosomal;Eukaryotic translation initiation factor 1A, Y-chromosomal	EIF1AX;EIF1AY	By matching			By MS/MS			By matching					By matching			By MS/MS	By MS/MS
O14737	Programmed cell death protein 5	PDCD5	By matching	By matching	By matching	By MS/MS			By matching		By matching					By matching	By matching
P19105;O14950	Myosin regulatory light chain 12A;Myosin regulatory light chain 12B	MYL12A;MYL12B	By MS/MS	By MS/MS	By MS/MS		By matching	By MS/MS	By matching		By matching		By matching		By matching	By matching		By matching
O15260	Surfeit locus protein 4	SURF4	By matching	By matching	By matching	By matching	By MS/MS	By matching						By MS/MS
O15355	Protein phosphatase 1G	PPM1G	By matching		By matching			By MS/MS
O15371	Eukaryotic translation initiation factor 3 subunit D	EIF3D	By matching		By matching	By MS/MS	By MS/MS	By MS/MS								By matching	By matching
O43143	Pre-mRNA-splicing factor ATP-dependent RNA helicase DHX15	DHX15	By matching	By matching	By matching	By MS/MS	By matching	By MS/MS						By matching				By matching
O43169	Cytochrome b5 type B	CYB5B												By MS/MS
O43175	D-3-phosphoglycerate dehydrogenase	PHGDH	By MS/MS	By MS/MS	By MS/MS	By MS/MS	By matching	By MS/MS	By matching	By MS/MS	By matching	By matching	By MS/MS		By MS/MS	By matching	By MS/MS	By MS/MS
O43399	Tumor protein D54	TPD52L2	By matching	By matching	By matching	By MS/MS	By MS/MS	By MS/MS		By matching		By matching					By matching	By matching
O43707;P35609;Q08043	Alpha-actinin-4	ACTN4	By MS/MS	By MS/MS	By MS/MS	By MS/MS	By MS/MS	By MS/MS	By matching	By matching	By MS/MS	By MS/MS	By MS/MS	By MS/MS	By matching	By MS/MS	By MS/MS	By MS/MS
O60488;O95573	Long-chain-fatty-acid--CoA ligase 4;Long-chain-fatty-acid--CoA ligase 3	ACSL4;ACSL3	By matching	By matching	By matching	By MS/MS	By MS/MS	By matching
O60506	Heterogeneous nuclear ribonucleoprotein Q	SYNCRIP	By MS/MS	By MS/MS	By MS/MS	By MS/MS	By MS/MS	By MS/MS	By matching	By matching				By matching	By matching	By matching	By matching	By matching
O60664	Perilipin-3	PLIN3				By MS/MS	By MS/MS	By MS/MS
O60814;P57053	Histone H2B type 1-K;Histone H2B type F-S	HIST1H2BK;H2BFS	By matching	By matching	By matching	By MS/MS	By MS/MS	By MS/MS	By matching	By matching	By matching	By matching	By matching	By matching	By matching	By matching	By matching	By matching
O75306	NADH dehydrogenase [ubiquinone] iron-sulfur protein 2, mitochondrial	NDUFS2					By matching	By MS/MS						By MS/MS
O75340	Programmed cell death protein 6	PDCD6	By MS/MS	By MS/MS	By MS/MS	By matching
O75347	Tubulin-specific chaperone A	TBCA	By matching		By matching	By MS/MS			By matching								By matching	By MS/MS
O75369	Filamin-B	FLNB	By matching	By matching	By matching	By MS/MS	By matching									By matching		By MS/MS
O75390	Citrate synthase, mitochondrial	CS	By matching	By matching	By matching	By MS/MS	By matching	By MS/MS					By MS/MS	By MS/MS				By matching
O75396	Vesicle-trafficking protein SEC22b	SEC22B	By matching	By matching	By matching	By MS/MS	By matching	By matching	By matching							By matching		By matching
O75475	PC4 and SFRS1-interacting protein	PSIP1			By matching	By MS/MS	By MS/MS	By MS/MS
O75531	Barrier-to-autointegration factor;Barrier-to-autointegration factor, N-terminally processed	BANF1	By MS/MS	By MS/MS	By MS/MS	By MS/MS	By MS/MS	By MS/MS	By matching	By matching	By matching		By MS/MS	By MS/MS		By matching	By MS/MS	By matching
O75533	Splicing factor 3B subunit 1	SF3B1		By matching		By MS/MS	By MS/MS	By MS/MS
O75607	Nucleoplasmin-3	NPM3	By matching	By matching	By matching	By MS/MS	By MS/MS	By matching	By matching			By matching			By MS/MS	By matching	By matching	By matching
O75821	Eukaryotic translation initiation factor 3 subunit G	EIF3G				By MS/MS		By MS/MS
O75874	Isocitrate dehydrogenase [NADP] cytoplasmic	IDH1		By matching	By matching	By MS/MS	By matching	By matching
O75915	PRA1 family protein 3	ARL6IP5				By MS/MS	By MS/MS	By MS/MS
O75947	ATP synthase subunit d, mitochondrial	ATP5H	By MS/MS	By matching	By matching	By MS/MS	By MS/MS							By matching
O76021	Ribosomal L1 domain-containing protein 1	RSL1D1		By matching		By MS/MS	By MS/MS	By MS/MS				By matching	By matching	By MS/MS			By MS/MS
O94933	SLIT and NTRK-like protein 3	SLITRK3	By matching	By matching		By MS/MS	By matching	By matching	By matching	By matching		By matching				By matching	By matching
O94979;Q9NQW1	Protein transport protein Sec31A;Protein transport protein Sec31B	SEC31A;SEC31B				By matching	By MS/MS	By matching
O95292	Vesicle-associated membrane protein-associated protein B/C	VAPB					By matching	By MS/MS
O95347	Structural maintenance of chromosomes protein 2	SMC2				By MS/MS
O95399	Urotensin-2	UTS2	By MS/MS	By MS/MS	By matching	By matching	By MS/MS		By matching	By matching	By matching			By matching	By matching	By matching	By matching	By matching
O95758	Polypyrimidine tract-binding protein 3	PTBP3	By matching	By matching	By matching		By matching	By matching						By MS/MS
O95831	Apoptosis-inducing factor 1, mitochondrial	AIFM1	By matching	By matching	By matching	By MS/MS	By matching	By matching								By matching
P00338;Q6ZMR3;P07864	L-lactate dehydrogenase A chain	LDHA	By MS/MS	By MS/MS	By MS/MS	By MS/MS	By MS/MS	By MS/MS	By MS/MS	By MS/MS	By MS/MS	By MS/MS	By MS/MS	By matching	By MS/MS	By MS/MS	By MS/MS	By MS/MS
P00505	Aspartate aminotransferase, mitochondrial	GOT2	By matching	By matching	By MS/MS	By matching	By matching	By MS/MS		By matching	By matching		By matching	By MS/MS		By matching
P00558;P07205	Phosphoglycerate kinase 1	PGK1	By MS/MS	By MS/MS	By MS/MS	By MS/MS	By MS/MS	By MS/MS	By MS/MS	By MS/MS	By MS/MS	By MS/MS	By MS/MS	By MS/MS	By MS/MS	By MS/MS	By MS/MS	By MS/MS
P00966	Argininosuccinate synthase	ASS1	By MS/MS	By matching	By MS/MS	By MS/MS	By MS/MS	By MS/MS		By matching			By matching			By matching	By matching	By matching
Q29940;P30685;P30498;P30495;P30493;P30492;P30491;P30490;P30484;P30464;P18465;P18464;P10319;P30512;P30459;P30457;P30456;P30455;P30453;P30450;P30447;P30443;P18462;P16190;P16189;P16188;P13746;P10316;P10314;P05534;P04439;P01892;P01891;Q29960;P30510;P30508;P30504;Q95604	HLA class I histocompatibility antigen, B-59 alpha chain;HLA class I histocompatibility antigen, B-35 alpha chain;HLA class I histocompatibility antigen, B-78 alpha chain;HLA class I histocompatibility antigen, B-56 alpha chain;HLA class I histocompatibility antigen, B-55 alpha chain;HLA class I histocompatibility antigen, B-54 alpha chain;HLA class I histocompatibility antigen, B-53 alpha chain;…	HLA-B;HLA-A;HLA-C		By matching		By matching												By MS/MS
P02545	Prelamin-A/C;Lamin-A/C	LMNA	By MS/MS	By MS/MS	By MS/MS	By MS/MS	By MS/MS	By MS/MS	By MS/MS	By MS/MS	By MS/MS	By MS/MS	By matching	By MS/MS	By MS/MS	By MS/MS	By MS/MS	By MS/MS
P02786	Transferrin receptor protein 1;Transferrin receptor protein 1, serum form	TFRC	By MS/MS	By matching	By matching	By MS/MS	By MS/MS	By MS/MS					By matching	By MS/MS		By matching
P02810	Salivary acidic proline-rich phosphoprotein 1/2;Salivary acidic proline-rich phosphoprotein 1/2;Salivary acidic proline-rich phosphoprotein 3/4;Peptide P-C	PRH1											By MS/MS
P04075;P09972	Fructose-bisphosphate aldolase A	ALDOA	By MS/MS	By MS/MS	By MS/MS	By MS/MS	By MS/MS	By MS/MS	By MS/MS	By MS/MS	By MS/MS	By MS/MS	By MS/MS	By matching	By MS/MS	By MS/MS	By MS/MS	By MS/MS
P04083	Annexin A1	ANXA1	By matching	By matching	By MS/MS	By MS/MS	By MS/MS	By MS/MS	By matching	By MS/MS	By matching	By matching	By matching		By matching	By MS/MS	By MS/MS	By MS/MS
P04259	Keratin, type II cytoskeletal 6B	KRT6B	By matching	By matching	By matching	By matching	By matching	By matching	By matching	By MS/MS	By matching	By matching	By matching	By matching	By matching	By matching	By matching	By matching
P04406	Glyceraldehyde-3-phosphate dehydrogenase	GAPDH	By MS/MS	By MS/MS	By MS/MS	By MS/MS	By MS/MS	By MS/MS	By MS/MS	By MS/MS	By MS/MS	By MS/MS	By MS/MS	By MS/MS	By MS/MS	By MS/MS	By MS/MS	By MS/MS
P04632	Calpain small subunit 1	CAPNS1	By matching	By matching	By matching	By MS/MS	By MS/MS	By MS/MS									By matching	By matching
P04792	Heat shock protein beta-1	HSPB1	By MS/MS	By MS/MS	By MS/MS	By MS/MS	By MS/MS	By MS/MS	By MS/MS	By MS/MS	By MS/MS	By MS/MS	By MS/MS	By matching	By MS/MS	By MS/MS	By MS/MS	By MS/MS
P04843	Dolichyl-diphosphooligosaccharide--protein glycosyltransferase subunit 1	RPN1					By matching							By MS/MS
P05109	Protein S100-A8;Protein S100-A8, N-terminally processed	S100A8									By MS/MS							By matching
P05114	Non-histone chromosomal protein HMG-14	HMGN1	By MS/MS	By MS/MS	By matching
P05141	ADP/ATP translocase 2;ADP/ATP translocase 2, N-terminally processed	SLC25A5	By MS/MS	By MS/MS	By MS/MS	By MS/MS	By MS/MS	By MS/MS	By matching	By matching	By matching	By matching	By MS/MS	By MS/MS	By matching	By matching	By matching	By matching
P05386	60S acidic ribosomal protein P1	RPLP1	By MS/MS	By MS/MS	By MS/MS	By MS/MS	By MS/MS	By MS/MS	By MS/MS	By MS/MS	By MS/MS	By MS/MS	By MS/MS	By matching	By MS/MS	By MS/MS	By MS/MS	By MS/MS
P05387	60S acidic ribosomal protein P2	RPLP2	By MS/MS	By MS/MS	By MS/MS	By MS/MS	By MS/MS	By MS/MS	By MS/MS	By matching	By MS/MS	By MS/MS	By MS/MS	By matching	By matching	By matching	By MS/MS	By MS/MS
P05388	60S acidic ribosomal protein P0	RPLP0	By matching	By matching	By matching	By matching	By MS/MS	By matching
P05783;CON__H-INV:HIT000015463;CON__Q92764;CON__Q497I4;Q92764	Keratin, type I cytoskeletal 18	KRT18	By MS/MS	By MS/MS	By MS/MS	By MS/MS	By MS/MS	By MS/MS	By MS/MS	By MS/MS	By MS/MS	By MS/MS	By MS/MS	By MS/MS	By MS/MS	By MS/MS	By MS/MS	By MS/MS
P06454	Prothymosin alpha;Prothymosin alpha, N-terminally processed;Thymosin alpha-1	PTMA	By MS/MS	By MS/MS	By matching			By MS/MS	By MS/MS	By MS/MS	By matching		By matching	By matching	By matching	By matching	By matching
P06576	ATP synthase subunit beta, mitochondrial	ATP5B	By MS/MS	By MS/MS	By MS/MS	By MS/MS	By MS/MS	By MS/MS	By matching	By matching	By MS/MS	By matching	By MS/MS	By MS/MS	By matching	By MS/MS	By matching	By matching
P06702	Protein S100-A9	S100A9							By matching	By matching	By MS/MS		By matching		By matching	By MS/MS	By matching	By matching
P06703	Protein S100-A6	S100A6	By matching	By matching	By matching	By MS/MS	By MS/MS	By MS/MS	By MS/MS	By MS/MS		By MS/MS	By MS/MS	By matching	By MS/MS	By MS/MS	By matching	By matching
P06733;P13929	Alpha-enolase	ENO1	By MS/MS	By MS/MS	By MS/MS	By MS/MS	By MS/MS	By MS/MS	By MS/MS	By MS/MS	By MS/MS	By MS/MS	By MS/MS	By matching	By MS/MS	By MS/MS	By MS/MS	By MS/MS
P06744;CON__Q3ZBD7	Glucose-6-phosphate isomerase	GPI	By matching	By matching	By matching	By MS/MS	By MS/MS	By MS/MS	By MS/MS	By MS/MS	By matching	By MS/MS	By MS/MS	By MS/MS	By MS/MS	By MS/MS	By MS/MS	By MS/MS
P06748	Nucleophosmin	NPM1	By MS/MS	By MS/MS	By MS/MS	By MS/MS	By MS/MS	By MS/MS	By MS/MS	By MS/MS	By MS/MS	By MS/MS	By MS/MS	By MS/MS	By MS/MS	By MS/MS	By MS/MS	By MS/MS
P06753;CON__Q3SX28;P09493;P07951	Tropomyosin alpha-3 chain	TPM3	By MS/MS	By MS/MS	By MS/MS	By MS/MS	By MS/MS	By MS/MS	By matching	By MS/MS	By matching	By matching			By matching	By matching		By matching
P07108	Acyl-CoA-binding protein	DBI	By MS/MS	By MS/MS	By MS/MS	By MS/MS	By matching	By MS/MS	By MS/MS	By matching	By matching	By MS/MS	By matching		By MS/MS	By MS/MS	By matching	By matching
P07195	L-lactate dehydrogenase B chain	LDHB	By MS/MS	By MS/MS	By MS/MS	By MS/MS	By MS/MS	By MS/MS	By MS/MS	By MS/MS	By MS/MS	By MS/MS	By MS/MS	By MS/MS	By MS/MS	By MS/MS	By MS/MS	By MS/MS
P07237	Protein disulfide-isomerase	P4HB	By MS/MS	By MS/MS	By MS/MS	By MS/MS	By MS/MS	By MS/MS	By matching	By matching	By matching	By MS/MS	By matching	By MS/MS	By matching	By matching	By matching	By matching
P07355;A6NMY6	Annexin A2;Putative annexin A2-like protein	ANXA2;ANXA2P2	By MS/MS	By MS/MS	By MS/MS	By MS/MS	By MS/MS	By MS/MS	By matching	By MS/MS	By MS/MS	By MS/MS	By MS/MS	By MS/MS	By MS/MS	By MS/MS	By MS/MS	By MS/MS
P07437;A6NNZ2;Q9BUF5;CON__ENSEMBL:ENSBTAP00000025008;Q9H4B7	Tubulin beta chain	TUBB	By MS/MS	By MS/MS	By MS/MS	By MS/MS	By MS/MS	By MS/MS	By MS/MS	By MS/MS	By MS/MS	By MS/MS	By MS/MS	By MS/MS	By MS/MS	By MS/MS	By MS/MS	By MS/MS
P07711	Cathepsin L1;Cathepsin L1 heavy chain;Cathepsin L1 light chain	CTSL	By matching		By matching		By MS/MS	By matching
P07737;CON__P02584	Profilin-1	PFN1	By MS/MS	By MS/MS	By MS/MS	By MS/MS	By MS/MS	By MS/MS	By MS/MS	By MS/MS	By MS/MS	By MS/MS	By MS/MS	By MS/MS	By MS/MS	By MS/MS	By MS/MS	By MS/MS
P07741	Adenine phosphoribosyltransferase	APRT	By matching		By matching	By matching	By matching	By matching									By MS/MS	By matching
P07814	Bifunctional glutamate/proline--tRNA ligase;Glutamate--tRNA ligase;Proline--tRNA ligase	EPRS	By matching	By matching	By matching	By MS/MS
P07900;Q14568;Q58FG0;Q58FF6;Q58FG1	Heat shock protein HSP 90-alpha	HSP90AA1	By MS/MS	By MS/MS	By MS/MS	By MS/MS	By MS/MS	By MS/MS	By MS/MS	By matching	By matching	By MS/MS	By matching	By matching	By matching	By MS/MS	By MS/MS	By MS/MS
P07910;P0DMR1;O60812;B7ZW38;B2RXH8	Heterogeneous nuclear ribonucleoproteins C1/C2	HNRNPC	By MS/MS	By MS/MS	By MS/MS	By MS/MS	By MS/MS	By MS/MS	By MS/MS	By MS/MS	By MS/MS	By MS/MS	By MS/MS	By MS/MS	By MS/MS	By MS/MS	By MS/MS	By MS/MS
P07954	Fumarate hydratase, mitochondrial	FH	By matching	By matching	By matching	By matching	By matching	By MS/MS			By matching
P08195	4F2 cell-surface antigen heavy chain	SLC3A2	By MS/MS	By MS/MS	By MS/MS	By MS/MS	By MS/MS	By MS/MS	By matching	By matching	By matching	By matching	By MS/MS	By MS/MS	By MS/MS	By MS/MS	By matching	By MS/MS
P08238;Q58FF7	Heat shock protein HSP 90-beta	HSP90AB1	By MS/MS	By MS/MS	By MS/MS	By MS/MS	By MS/MS	By MS/MS	By MS/MS	By MS/MS	By MS/MS	By MS/MS	By MS/MS	By MS/MS	By MS/MS	By MS/MS	By MS/MS	By MS/MS
P08621	U1 small nuclear ribonucleoprotein 70 kDa	SNRNP70					By MS/MS	By MS/MS
P08670;P41219;P17661;Q16352;P07197;P07196;P12036	Vimentin	VIM	By MS/MS	By MS/MS	By MS/MS	By MS/MS	By MS/MS	By MS/MS	By MS/MS	By MS/MS	By MS/MS	By MS/MS	By MS/MS	By MS/MS	By MS/MS	By MS/MS	By MS/MS	By MS/MS
P08708	40S ribosomal protein S17	RPS17	By MS/MS	By MS/MS	By MS/MS	By MS/MS	By MS/MS	By MS/MS	By matching	By MS/MS	By matching	By matching	By MS/MS		By matching	By MS/MS	By MS/MS	By MS/MS
P08758	Annexin A5	ANXA5	By MS/MS	By MS/MS	By MS/MS	By matching	By matching	By MS/MS	By matching	By MS/MS		By matching	By MS/MS		By matching	By MS/MS	By MS/MS	By MS/MS
P08865	40S ribosomal protein SA	RPSA	By MS/MS	By MS/MS	By MS/MS	By MS/MS	By MS/MS	By MS/MS	By matching	By MS/MS	By MS/MS	By matching	By MS/MS	By matching	By matching	By MS/MS	By matching	By MS/MS
P09104	Gamma-enolase	ENO2	By matching	By matching	By matching	By MS/MS	By matching	By matching	By matching	By matching	By matching	By matching	By matching	By matching	By matching	By matching	By matching	By matching
P09382	Galectin-1	LGALS1					By matching		By MS/MS	By matching	By matching	By MS/MS			By matching	By MS/MS		By matching
P09429;B2RPK0	High mobility group protein B1	HMGB1	By MS/MS	By MS/MS	By matching	By MS/MS	By MS/MS	By MS/MS	By matching	By MS/MS	By matching	By MS/MS	By matching		By MS/MS	By MS/MS	By MS/MS	By MS/MS
P09651;Q32P51	Heterogeneous nuclear ribonucleoprotein A1;Heterogeneous nuclear ribonucleoprotein A1, N-terminally processed	HNRNPA1	By MS/MS	By MS/MS	By MS/MS	By MS/MS	By MS/MS	By MS/MS	By MS/MS	By MS/MS	By MS/MS	By MS/MS	By MS/MS	By MS/MS	By MS/MS	By MS/MS	By MS/MS	By MS/MS
P09669	Cytochrome c oxidase subunit 6C	COX6C		By matching	By matching	By matching	By matching	By MS/MS
P09874	Poly [ADP-ribose] polymerase 1	PARP1		By matching		By MS/MS	By matching	By MS/MS		By matching			By matching	By MS/MS		By matching	By MS/MS	By matching
Q71UI9;P0C0S5	Histone H2A.V;Histone H2A.Z	H2AFV;H2AFZ	By matching	By matching	By matching	By MS/MS	By MS/MS	By MS/MS	By MS/MS	By MS/MS	By matching	By MS/MS	By matching	By matching	By matching	By MS/MS	By MS/MS	By matching
Q99878;Q96KK5;P0C0S8;Q9BTM1;Q8IUE6;Q96QV6	Histone H2A type 1-J;Histone H2A type 1-H;Histone H2A type 1;Histone H2A.J;Histone H2A type 2-B	HIST1H2AJ;HIST1H2AH;HIST1H2AG;H2AFJ;HIST2H2AB	By MS/MS	By MS/MS	By MS/MS	By MS/MS	By MS/MS	By MS/MS	By MS/MS	By MS/MS	By MS/MS	By MS/MS	By MS/MS	By MS/MS	By MS/MS	By MS/MS	By MS/MS	By MS/MS
P0DMV9;P0DMV8;P34931	Heat shock 70 kDa protein 1B;Heat shock 70 kDa protein 1A	HSPA1B;HSPA1A	By MS/MS	By MS/MS	By MS/MS	By MS/MS	By MS/MS	By MS/MS	By MS/MS	By MS/MS	By MS/MS	By MS/MS	By MS/MS	By matching	By matching	By MS/MS	By MS/MS	By MS/MS
P0DP25;P0DP24;P0DP23;P27482;P02585			By MS/MS	By MS/MS	By MS/MS	By MS/MS	By MS/MS	By MS/MS	By MS/MS	By MS/MS	By matching	By MS/MS	By MS/MS		By MS/MS	By MS/MS	By MS/MS	By MS/MS
P10412	Histone H1.4	HIST1H1E	By MS/MS	By MS/MS	By MS/MS	By MS/MS	By MS/MS	By MS/MS	By MS/MS	By MS/MS	By MS/MS	By MS/MS	By MS/MS	By matching	By MS/MS	By MS/MS	By MS/MS	By MS/MS
P10599	Thioredoxin	TXN	By matching	By MS/MS	By MS/MS	By matching	By MS/MS	By matching	By matching	By matching						By matching	By MS/MS	By matching
P10606	Cytochrome c oxidase subunit 5B, mitochondrial	COX5B	By matching	By matching	By matching	By MS/MS			By matching		By matching	By matching		By matching		By matching	By matching
P10809	60 kDa heat shock protein, mitochondrial	HSPD1	By MS/MS	By MS/MS	By MS/MS	By MS/MS	By MS/MS	By MS/MS	By MS/MS	By MS/MS	By MS/MS	By MS/MS	By MS/MS	By MS/MS	By MS/MS	By MS/MS	By MS/MS	By MS/MS
P11021	78 kDa glucose-regulated protein	HSPA5	By MS/MS	By MS/MS	By MS/MS	By MS/MS	By MS/MS	By MS/MS	By MS/MS	By MS/MS	By MS/MS	By MS/MS	By MS/MS	By MS/MS	By matching	By MS/MS	By MS/MS	By MS/MS
P11142;P54652	Heat shock cognate 71 kDa protein	HSPA8	By MS/MS	By MS/MS	By MS/MS	By MS/MS	By MS/MS	By MS/MS	By MS/MS	By MS/MS	By MS/MS	By MS/MS	By MS/MS	By MS/MS	By MS/MS	By MS/MS	By MS/MS	By MS/MS
P11310	Medium-chain specific acyl-CoA dehydrogenase, mitochondrial	ACADM				By matching	By matching	By MS/MS
P11586	C-1-tetrahydrofolate synthase, cytoplasmic;Methylenetetrahydrofolate dehydrogenase;Methenyltetrahydrofolate cyclohydrolase;Formyltetrahydrofolate synthetase;C-1-tetrahydrofolate synthase, cytoplasmic, N-terminally processed	MTHFD1			By matching	By MS/MS	By matching	By MS/MS		By matching						By matching
P11940;Q9H361;Q13310;Q4VXU2	Polyadenylate-binding protein 1;Polyadenylate-binding protein 3	PABPC1;PABPC3	By matching	By matching	By matching	By MS/MS	By MS/MS	By MS/MS	By matching	By matching	By matching	By matching	By MS/MS	By MS/MS			By MS/MS	By matching
P12235	ADP/ATP translocase 1	SLC25A4	By matching	By matching	By matching	By MS/MS	By matching	By MS/MS		By matching			By matching	By matching
P12236	ADP/ATP translocase 3;ADP/ATP translocase 3, N-terminally processed	SLC25A6	By MS/MS	By MS/MS	By MS/MS	By matching	By matching	By matching		By matching	By matching		By matching	By matching		By matching
P12268	Inosine-5-monophosphate dehydrogenase 2	IMPDH2	By MS/MS	By matching	By MS/MS				By matching	By matching		By matching				By matching		By matching
P12277	Creatine kinase B-type	CKB	By MS/MS	By MS/MS	By MS/MS	By MS/MS	By matching	By MS/MS	By MS/MS	By MS/MS	By matching	By MS/MS	By matching		By matching	By MS/MS	By matching	By MS/MS
P12814	Alpha-actinin-1	ACTN1	By matching	By matching	By matching	By matching	By MS/MS	By MS/MS	By matching	By matching	By matching	By matching	By matching	By matching	By matching	By matching	By matching	By matching
P12956	X-ray repair cross-complementing protein 6	XRCC6	By matching	By matching	By matching	By MS/MS	By MS/MS	By MS/MS		By matching						By MS/MS
P13010	X-ray repair cross-complementing protein 5	XRCC5	By matching	By matching	By matching	By MS/MS	By MS/MS	By MS/MS					By MS/MS	By MS/MS		By matching	By matching	By matching
P13639;Q15029	Elongation factor 2	EEF2	By MS/MS	By MS/MS	By MS/MS	By MS/MS	By MS/MS	By MS/MS	By MS/MS	By MS/MS	By MS/MS	By MS/MS	By MS/MS	By MS/MS	By MS/MS	By MS/MS	By MS/MS	By MS/MS
P13693	Translationally-controlled tumor protein	TPT1	By matching	By matching	By matching	By MS/MS	By MS/MS	By MS/MS										By matching
P13797	Plastin-3	PLS3				By MS/MS		By matching
P14174	Macrophage migration inhibitory factor	MIF	By MS/MS	By MS/MS	By MS/MS	By MS/MS	By MS/MS	By MS/MS	By MS/MS	By MS/MS	By MS/MS	By matching	By MS/MS		By MS/MS	By MS/MS	By MS/MS	By MS/MS
P14314	Glucosidase 2 subunit beta	PRKCSH	By matching	By matching	By matching	By MS/MS	By MS/MS	By MS/MS	By matching	By matching				By matching		By matching	By MS/MS	By matching
P14550	Alcohol dehydrogenase [NADP(+)]	AKR1A1	By MS/MS	By MS/MS	By MS/MS	By matching	By MS/MS	By matching	By matching	By MS/MS	By matching	By MS/MS	By matching		By matching	By MS/MS	By MS/MS	By MS/MS
P14618;P30613	Pyruvate kinase PKM	PKM	By MS/MS	By MS/MS	By MS/MS	By MS/MS	By MS/MS	By MS/MS	By MS/MS	By MS/MS	By MS/MS	By MS/MS	By MS/MS	By MS/MS	By MS/MS	By MS/MS	By MS/MS	By MS/MS
P14625;Q58FF3	Endoplasmin	HSP90B1	By MS/MS	By MS/MS	By MS/MS	By MS/MS	By MS/MS	By MS/MS	By matching	By matching	By matching	By matching	By MS/MS	By MS/MS	By MS/MS	By MS/MS	By MS/MS	By matching
P14866	Heterogeneous nuclear ribonucleoprotein L	HNRNPL	By matching	By MS/MS	By matching	By MS/MS	By MS/MS	By MS/MS
P15121	Aldose reductase	AKR1B1	By MS/MS	By matching	By matching	By matching	By MS/MS	By MS/MS	By matching	By MS/MS	By matching	By MS/MS	By MS/MS	By matching	By MS/MS	By MS/MS	By MS/MS	By MS/MS
P15170;Q8IYD1	Eukaryotic peptide chain release factor GTP-binding subunit ERF3A;Eukaryotic peptide chain release factor GTP-binding subunit ERF3B	GSPT1;GSPT2	By matching	By matching	By matching	By MS/MS	By matching	By MS/MS
P15311	Ezrin	EZR	By MS/MS	By MS/MS	By MS/MS	By MS/MS	By MS/MS	By MS/MS	By matching	By MS/MS	By MS/MS	By matching	By MS/MS	By matching	By matching	By MS/MS	By MS/MS	By MS/MS
P15531	Nucleoside diphosphate kinase A	NME1	By matching	By matching	By matching	By MS/MS	By MS/MS	By MS/MS		By matching	By MS/MS			By matching		By matching	By matching	By matching
P15880	40S ribosomal protein S2	RPS2	By MS/MS	By MS/MS	By MS/MS	By MS/MS	By matching	By MS/MS	By matching	By matching	By matching	By matching	By matching	By matching		By matching	By matching	By matching
P15924	Desmoplakin	DSP	By matching	By matching	By matching	By matching		By matching		By MS/MS					By MS/MS			By matching
P16104	Histone H2AX	H2AFX	By matching	By matching	By matching	By MS/MS	By MS/MS	By MS/MS	By matching	By matching	By matching	By matching	By matching	By matching	By matching	By matching	By matching	By matching
P16401	Histone H1.5	HIST1H1B	By MS/MS	By MS/MS	By MS/MS	By MS/MS	By MS/MS	By MS/MS	By MS/MS	By MS/MS	By matching	By MS/MS	By matching		By MS/MS	By MS/MS	By matching	By MS/MS
P16403;P16402;Q02539;P22492	Histone H1.2;Histone H1.3	HIST1H1C;HIST1H1D	By MS/MS	By MS/MS	By MS/MS	By MS/MS	By matching	By matching	By matching	By matching	By matching	By matching	By matching	By matching	By matching	By matching	By matching	By matching
P16435	NADPH--cytochrome P450 reductase	POR	By matching	By matching	By matching	By MS/MS	By MS/MS	By MS/MS										By matching
P16949;Q9H169	Stathmin	STMN1	By MS/MS	By matching	By MS/MS	By MS/MS	By MS/MS	By MS/MS							By matching		By matching	By matching
P17066;P48741	Heat shock 70 kDa protein 6;Putative heat shock 70 kDa protein 7	HSPA6;HSPA7	By matching	By matching	By matching	By matching	By matching	By matching	By matching	By MS/MS	By MS/MS	By MS/MS	By MS/MS	By MS/MS	By matching	By MS/MS	By MS/MS	By matching
P17174	Aspartate aminotransferase, cytoplasmic	GOT1				By matching	By MS/MS
P17844	Probable ATP-dependent RNA helicase DDX5	DDX5	By MS/MS	By matching	By matching	By MS/MS	By MS/MS	By MS/MS			By matching		By MS/MS	By MS/MS		By matching	By matching	By matching
P17931	Galectin-3	LGALS3				By MS/MS	By MS/MS	By MS/MS	By matching			By matching		By matching		By matching
P17987	T-complex protein 1 subunit alpha	TCP1	By MS/MS	By matching	By matching	By matching	By MS/MS	By MS/MS								By matching
P18077	60S ribosomal protein L35a	RPL35A	By matching	By matching	By matching	By MS/MS	By MS/MS	By MS/MS		By MS/MS	By MS/MS		By matching				By matching	By matching
P18124	60S ribosomal protein L7	RPL7	By MS/MS	By MS/MS	By MS/MS	By matching	By matching	By MS/MS	By MS/MS	By MS/MS	By matching	By matching	By MS/MS	By matching	By matching	By matching	By matching	By matching
P18206	Vinculin	VCL	By matching	By matching		By MS/MS	By MS/MS	By MS/MS					By matching			By matching	By MS/MS	By MS/MS
P18621	60S ribosomal protein L17	RPL17	By matching	By matching	By matching	By MS/MS	By MS/MS	By MS/MS	By MS/MS	By MS/MS	By matching	By MS/MS	By matching		By MS/MS	By MS/MS	By matching	By MS/MS
P18669;P15259;Q8N0Y7	Phosphoglycerate mutase 1;Phosphoglycerate mutase 2	PGAM1;PGAM2	By MS/MS	By MS/MS	By MS/MS	By MS/MS	By matching	By MS/MS	By MS/MS	By MS/MS	By MS/MS	By MS/MS	By MS/MS	By matching	By matching	By MS/MS	By MS/MS	By MS/MS
P19338	Nucleolin	NCL	By MS/MS	By MS/MS	By MS/MS	By MS/MS	By MS/MS	By MS/MS	By MS/MS	By MS/MS	By MS/MS	By MS/MS	By MS/MS	By matching	By MS/MS	By MS/MS	By MS/MS	By MS/MS
P20290	Transcription factor BTF3	BTF3	By matching	By matching	By matching	By matching	By MS/MS	By MS/MS	By matching	By matching	By matching	By MS/MS	By matching	By matching	By MS/MS	By MS/MS	By matching	By MS/MS
P20671	Histone H2A type 1-D	HIST1H2AD	By matching	By matching	By matching	By MS/MS	By matching	By matching	By matching	By matching	By matching	By matching	By matching	By matching	By matching	By matching	By matching	By matching
P20700	Lamin-B1	LMNB1				By MS/MS	By MS/MS	By MS/MS						By MS/MS
P20962	Parathymosin	PTMS	By matching	By matching	By matching	By matching	By MS/MS	By MS/MS
P21333	Filamin-A	FLNA	By matching	By matching	By matching	By MS/MS	By MS/MS	By MS/MS						By matching	By matching	By MS/MS	By matching	By matching
P21796	Voltage-dependent anion-selective channel protein 1	VDAC1	By matching	By MS/MS	By matching	By MS/MS	By MS/MS	By MS/MS								By matching
P22314	Ubiquitin-like modifier-activating enzyme 1	UBA1	By matching	By matching	By matching	By MS/MS	By matching	By matching									By MS/MS	By matching
P22392;O60361	Nucleoside diphosphate kinase B;Putative nucleoside diphosphate kinase	NME2;NME2P1	By matching	By MS/MS	By MS/MS	By MS/MS	By MS/MS	By MS/MS	By MS/MS	By MS/MS	By matching		By matching			By MS/MS	By matching	By MS/MS
P22626	Heterogeneous nuclear ribonucleoproteins A2/B1	HNRNPA2B1	By MS/MS	By MS/MS	By MS/MS	By MS/MS	By MS/MS	By MS/MS	By MS/MS	By MS/MS	By MS/MS	By MS/MS	By matching	By MS/MS	By MS/MS	By MS/MS	By MS/MS	By MS/MS
P22695	Cytochrome b-c1 complex subunit 2, mitochondrial	UQCRC2	By matching	By matching	By matching	By MS/MS	By MS/MS	By MS/MS						By MS/MS
P23246	Splicing factor, proline- and glutamine-rich	SFPQ	By matching	By matching	By MS/MS	By MS/MS	By MS/MS	By MS/MS	By matching	By matching		By matching		By MS/MS	By matching	By matching	By MS/MS	By matching
P23284	Peptidyl-prolyl cis-trans isomerase B	PPIB	By MS/MS	By MS/MS	By MS/MS	By MS/MS	By MS/MS	By MS/MS	By matching	By MS/MS	By matching	By matching			By matching	By matching	By matching	By matching
P23381	Tryptophan--tRNA ligase, cytoplasmic;T1-TrpRS;T2-TrpRS	WARS				By MS/MS	By MS/MS	By MS/MS
P23396	40S ribosomal protein S3	RPS3	By matching	By matching	By MS/MS	By matching	By matching	By MS/MS		By matching	By matching	By matching	By MS/MS	By MS/MS	By matching	By MS/MS	By matching	By matching
Q16778;P33778;P23527;Q96A08	Histone H2B type 2-E;Histone H2B type 1-B;Histone H2B type 1-O;Histone H2B type 1-A	HIST2H2BE;HIST1H2BB;HIST1H2BO;HIST1H2BA	By MS/MS	By MS/MS	By MS/MS	By matching	By MS/MS	By matching	By MS/MS	By MS/MS	By MS/MS	By MS/MS	By matching	By matching	By MS/MS	By MS/MS	By MS/MS	By MS/MS
P23528;Q9Y281;P60981	Cofilin-1	CFL1	By MS/MS	By MS/MS	By MS/MS	By MS/MS	By MS/MS	By MS/MS	By MS/MS	By MS/MS	By MS/MS	By MS/MS	By MS/MS	By matching	By MS/MS	By MS/MS	By MS/MS	By MS/MS
P23588	Eukaryotic translation initiation factor 4B	EIF4B	By matching	By matching	By matching	By MS/MS	By MS/MS	By MS/MS	By matching	By matching		By matching	By matching		By MS/MS	By matching	By MS/MS	By MS/MS
P23921	Ribonucleoside-diphosphate reductase large subunit	RRM1				By matching		By MS/MS				By matching					By matching
P24534	Elongation factor 1-beta	EEF1B2	By MS/MS	By MS/MS	By MS/MS	By MS/MS	By MS/MS	By MS/MS	By matching	By matching		By MS/MS	By matching		By MS/MS	By matching		By MS/MS
P24752	Acetyl-CoA acetyltransferase, mitochondrial	ACAT1	By matching	By matching	By matching	By matching	By MS/MS	By MS/MS						By MS/MS		By matching	By matching	By matching
P25398	40S ribosomal protein S12	RPS12	By MS/MS	By MS/MS	By matching	By matching	By matching	By matching	By matching	By MS/MS	By MS/MS	By MS/MS	By MS/MS	By MS/MS	By MS/MS	By MS/MS	By MS/MS	By MS/MS
P25705	ATP synthase subunit alpha, mitochondrial	ATP5A1	By MS/MS	By MS/MS	By MS/MS	By MS/MS	By MS/MS	By MS/MS	By matching	By MS/MS	By MS/MS		By matching	By MS/MS	By matching	By MS/MS		By MS/MS
P25786	Proteasome subunit alpha type-1	PSMA1	By matching	By MS/MS	By matching	By matching	By MS/MS	By MS/MS		By matching	By matching			By matching
P25815	Protein S100-P	S100P	By matching		By matching		By MS/MS	By MS/MS								By MS/MS
P26038;P35241	Moesin;Radixin	MSN;RDX	By matching	By matching	By matching	By MS/MS	By MS/MS	By MS/MS	By matching	By MS/MS	By matching	By matching	By matching	By matching	By matching	By MS/MS	By matching	By matching
P26373	60S ribosomal protein L13	RPL13	By MS/MS	By MS/MS	By MS/MS	By MS/MS	By MS/MS	By MS/MS	By MS/MS	By MS/MS	By matching	By MS/MS	By matching	By MS/MS	By MS/MS	By MS/MS	By MS/MS	By MS/MS
P26447	Protein S100-A4	S100A4	By MS/MS	By MS/MS	By matching	By MS/MS	By MS/MS	By MS/MS	By MS/MS	By MS/MS	By matching	By MS/MS	By matching		By matching	By MS/MS	By matching	By MS/MS
P26599	Polypyrimidine tract-binding protein 1	PTBP1	By matching	By matching	By MS/MS	By MS/MS	By MS/MS	By MS/MS	By matching	By matching	By matching	By matching	By MS/MS	By MS/MS	By matching	By MS/MS	By MS/MS	By MS/MS
P26639	Threonine--tRNA ligase, cytoplasmic	TARS	By MS/MS	By MS/MS	By MS/MS	By MS/MS	By matching	By MS/MS	By matching	By matching		By matching	By MS/MS			By matching	By MS/MS	By matching
P26640	Valine--tRNA ligase	VARS	By matching	By matching	By MS/MS	By MS/MS	By matching	By MS/MS		By matching		By matching				By MS/MS	By matching	By matching
P26641	Elongation factor 1-gamma	EEF1G	By MS/MS	By MS/MS	By MS/MS	By MS/MS	By MS/MS	By MS/MS	By MS/MS	By MS/MS	By MS/MS	By matching	By MS/MS	By MS/MS	By matching	By MS/MS	By MS/MS	By MS/MS
P27635;Q96L21	60S ribosomal protein L10	RPL10	By matching	By matching	By matching	By MS/MS	By MS/MS	By matching	By matching	By MS/MS	By matching	By matching	By MS/MS		By matching	By matching	By matching	By matching
P27797	Calreticulin	CALR	By matching	By matching	By matching	By MS/MS	By MS/MS	By MS/MS						By MS/MS	By matching	By matching	By matching	By MS/MS
P27824	Calnexin	CANX	By matching	By matching	By matching	By MS/MS	By MS/MS	By MS/MS					By matching				By matching	By matching
P28066	Proteasome subunit alpha type-5	PSMA5															By MS/MS	By matching
P28072	Proteasome subunit beta type-6	PSMB6		By matching	By MS/MS	By MS/MS	By matching	By MS/MS
P29401	Transketolase	TKT	By MS/MS	By MS/MS	By MS/MS	By MS/MS	By MS/MS	By MS/MS	By MS/MS	By MS/MS	By MS/MS	By MS/MS	By MS/MS	By matching	By MS/MS	By MS/MS	By MS/MS	By MS/MS
P29692	Elongation factor 1-delta	EEF1D	By MS/MS	By MS/MS	By matching	By MS/MS	By MS/MS	By MS/MS	By MS/MS	By MS/MS	By matching	By matching	By matching	By matching	By MS/MS	By matching	By MS/MS	By MS/MS
P30040	Endoplasmic reticulum resident protein 29	ERP29	By MS/MS	By MS/MS	By MS/MS	By MS/MS	By MS/MS	By MS/MS	By matching			By matching	By matching	By matching	By MS/MS	By matching		By matching
P30041	Peroxiredoxin-6	PRDX6	By MS/MS	By MS/MS	By MS/MS	By matching	By MS/MS	By matching	By matching	By matching	By matching	By MS/MS	By MS/MS		By MS/MS	By MS/MS	By matching	By MS/MS
P30044	Peroxiredoxin-5, mitochondrial	PRDX5	By matching	By matching	By matching	By matching	By MS/MS	By MS/MS	By matching	By matching	By matching	By matching	By matching		By MS/MS	By matching	By matching	By matching
P30049	ATP synthase subunit delta, mitochondrial	ATP5D						By MS/MS
P30050	60S ribosomal protein L12	RPL12	By MS/MS	By MS/MS	By MS/MS	By MS/MS	By MS/MS	By MS/MS	By matching	By MS/MS	By matching	By MS/MS	By matching			By MS/MS	By MS/MS	By matching
P30101	Protein disulfide-isomerase A3	PDIA3	By MS/MS	By matching	By MS/MS	By MS/MS	By MS/MS	By MS/MS	By matching	By matching	By matching	By matching	By matching	By matching	By matching	By matching	By MS/MS	By MS/MS
P30153	Serine/threonine-protein phosphatase 2A 65 kDa regulatory subunit A alpha isoform	PPP2R1A	By matching	By matching	By matching	By matching	By matching	By MS/MS	By matching				By matching			By MS/MS
P30419	Glycylpeptide N-tetradecanoyltransferase 1	NMT1		By matching		By MS/MS	By MS/MS	By matching
P31327	Carbamoyl-phosphate synthase [ammonia], mitochondrial	CPS1		By matching	By MS/MS	By MS/MS					By matching			By matching		By matching
P31942	Heterogeneous nuclear ribonucleoprotein H3	HNRNPH3		By matching	By matching	By matching	By MS/MS	By matching		By matching		By matching		By matching		By MS/MS
P31943;P55795	Heterogeneous nuclear ribonucleoprotein H;Heterogeneous nuclear ribonucleoprotein H, N-terminally processed;Heterogeneous nuclear ribonucleoprotein H2	HNRNPH1;HNRNPH2	By MS/MS	By MS/MS	By MS/MS	By MS/MS		By MS/MS	By matching	By matching	By matching	By matching	By matching	By MS/MS	By MS/MS	By MS/MS	By matching	By matching
P31946;P27348	14-3-3 protein beta/alpha;14-3-3 protein beta/alpha, N-terminally processed;14-3-3 protein theta	YWHAB;YWHAQ	By matching		By matching	By matching	By MS/MS	By matching	By matching	By matching	By MS/MS	By matching	By matching	By matching	By matching	By matching	By MS/MS	By MS/MS
P31947	14-3-3 protein sigma	SFN	By matching	By matching	By matching	By MS/MS	By MS/MS	By MS/MS	By matching	By matching	By MS/MS	By MS/MS	By matching		By matching	By MS/MS	By MS/MS	By matching
P31948	Stress-induced-phosphoprotein 1	STIP1						By MS/MS	By matching			By matching			By matching	By MS/MS	By MS/MS	By matching
P31949	Protein S100-A11;Protein S100-A11, N-terminally processed	S100A11	By MS/MS	By MS/MS	By matching	By MS/MS	By MS/MS	By MS/MS	By MS/MS	By MS/MS	By MS/MS	By MS/MS	By MS/MS	By matching	By MS/MS	By MS/MS	By MS/MS	By MS/MS
P32119	Peroxiredoxin-2	PRDX2	By matching	By matching	By matching	By matching	By matching	By matching	By matching	By matching	By matching	By matching		By matching	By matching	By MS/MS	By matching	By MS/MS
P32969	60S ribosomal protein L9	RPL9	By matching	By MS/MS	By matching	By MS/MS	By MS/MS	By MS/MS		By MS/MS	By matching	By matching				By matching	By matching	By matching
P34897	Serine hydroxymethyltransferase, mitochondrial	SHMT2	By MS/MS	By MS/MS	By MS/MS	By MS/MS	By MS/MS	By matching	By matching	By matching	By matching	By matching	By matching	By MS/MS	By matching	By matching	By matching	By matching
P34932	Heat shock 70 kDa protein 4	HSPA4	By matching	By matching	By matching	By MS/MS	By MS/MS	By MS/MS				By matching		By matching			By matching	By matching
P35232	Prohibitin	PHB	By matching			By MS/MS	By MS/MS	By MS/MS						By MS/MS		By matching	By matching
P35237	Serpin B6	SERPINB6	By matching			By MS/MS	By MS/MS	By MS/MS						By matching
P35268	60S ribosomal protein L22	RPL22	By matching	By matching	By MS/MS	By matching	By matching	By matching	By matching	By MS/MS	By MS/MS	By MS/MS	By MS/MS		By MS/MS	By MS/MS	By matching	By MS/MS
P35579;P35580;P35749	Myosin-9	MYH9	By MS/MS	By MS/MS	By matching	By MS/MS	By MS/MS	By MS/MS	By matching	By MS/MS	By matching	By MS/MS	By MS/MS		By MS/MS	By MS/MS	By MS/MS	By MS/MS
P35613	Basigin	BSG	By MS/MS	By MS/MS	By matching					By MS/MS	By matching	By matching	By matching	By matching		By matching	By matching	By matching
P35637	RNA-binding protein FUS	FUS	By matching	By matching	By matching	By MS/MS	By matching	By MS/MS	By matching	By matching	By matching	By matching		By matching	By matching	By MS/MS	By matching	By MS/MS
P36578	60S ribosomal protein L4	RPL4	By MS/MS	By MS/MS	By MS/MS	By MS/MS	By MS/MS	By MS/MS	By MS/MS	By MS/MS	By MS/MS	By MS/MS	By matching	By matching	By MS/MS	By MS/MS	By MS/MS	By MS/MS
P36871	Phosphoglucomutase-1	PGM1	By matching	By matching		By MS/MS	By MS/MS	By MS/MS					By matching				By MS/MS
P37108	Signal recognition particle 14 kDa protein	SRP14	By matching	By matching	By matching	By MS/MS	By matching	By MS/MS	By matching	By matching				By matching	By matching	By MS/MS	By matching	By matching
P37802;Q9UI15	Transgelin-2	TAGLN2	By MS/MS	By MS/MS	By MS/MS	By MS/MS	By MS/MS	By MS/MS	By MS/MS	By MS/MS	By MS/MS	By MS/MS	By MS/MS		By MS/MS	By MS/MS	By MS/MS	By MS/MS
P38159;Q96E39;O75526;Q8N7X1	RNA-binding motif protein, X chromosome;RNA-binding motif protein, X chromosome, N-terminally processed;RNA binding motif protein, X-linked-like-1	RBMX;RBMXL1	By matching	By matching	By matching	By MS/MS	By MS/MS	By MS/MS		By matching		By matching			By matching	By matching	By matching	By matching
P38646	Stress-70 protein, mitochondrial	HSPA9	By MS/MS	By MS/MS	By MS/MS	By MS/MS	By MS/MS	By MS/MS	By matching	By MS/MS	By MS/MS	By matching	By MS/MS	By MS/MS	By MS/MS	By MS/MS	By MS/MS	By MS/MS
P38919	Eukaryotic initiation factor 4A-III;Eukaryotic initiation factor 4A-III, N-terminally processed	EIF4A3	By matching	By matching	By matching	By matching		By matching	By matching			By matching			By matching	By matching	By MS/MS	By matching
P39019	40S ribosomal protein S19	RPS19	By MS/MS	By MS/MS	By MS/MS	By MS/MS	By MS/MS	By MS/MS	By matching	By MS/MS	By MS/MS	By MS/MS	By MS/MS	By matching	By matching	By MS/MS	By MS/MS	By MS/MS
P39023	60S ribosomal protein L3	RPL3	By MS/MS	By MS/MS	By MS/MS	By MS/MS	By MS/MS	By MS/MS	By MS/MS	By MS/MS	By matching	By matching	By matching	By matching	By matching	By MS/MS	By matching	By matching
P39687	Acidic leucine-rich nuclear phosphoprotein 32 family member A	ANP32A	By matching	By matching	By matching	By MS/MS	By MS/MS	By MS/MS	By matching	By matching		By matching	By matching			By MS/MS	By MS/MS	By MS/MS
P39748	Flap endonuclease 1	FEN1	By matching	By matching	By matching		By MS/MS	By MS/MS									By matching
P40121	Macrophage-capping protein	CAPG	By matching				By matching			By matching	By matching	By matching				By MS/MS		By matching
P40227;Q92526	T-complex protein 1 subunit zeta;T-complex protein 1 subunit zeta-2	CCT6A;CCT6B	By matching	By MS/MS	By matching			By MS/MS	By matching	By MS/MS	By matching					By matching		By matching
P40429;Q6NVV1	60S ribosomal protein L13a	RPL13A	By MS/MS	By MS/MS	By MS/MS	By MS/MS	By matching	By MS/MS	By matching	By matching		By matching	By matching	By matching	By matching	By matching	By matching	By matching
P40925	Malate dehydrogenase, cytoplasmic	MDH1	By matching	By matching	By MS/MS	By matching	By MS/MS	By matching	By matching	By matching	By MS/MS	By matching	By matching		By matching	By MS/MS	By matching	By matching
P40926	Malate dehydrogenase, mitochondrial	MDH2	By MS/MS	By MS/MS	By MS/MS	By MS/MS	By MS/MS	By MS/MS	By matching	By matching		By matching	By matching	By matching		By matching	By matching	By matching
P40939	Trifunctional enzyme subunit alpha, mitochondrial;Long-chain enoyl-CoA hydratase;Long chain 3-hydroxyacyl-CoA dehydrogenase	HADHA						By MS/MS
P41250	Glycine--tRNA ligase	GARS			By matching	By MS/MS	By MS/MS	By MS/MS	By matching						By matching	By matching	By MS/MS	By matching
P42126	Enoyl-CoA delta isomerase 1, mitochondrial	ECI1	By matching	By matching	By matching	By MS/MS	By MS/MS	By matching						By matching
P42167	Lamina-associated polypeptide 2, isoforms beta/gamma;Thymopoietin;Thymopentin	TMPO	By matching	By matching	By matching	By MS/MS	By MS/MS	By MS/MS								By MS/MS
P42704	Leucine-rich PPR motif-containing protein, mitochondrial	LRPPRC												By MS/MS
P43121	Cell surface glycoprotein MUC18	MCAM	By matching		By matching		By MS/MS
P43243	Matrin-3	MATR3	By matching	By matching	By matching	By MS/MS	By MS/MS	By MS/MS	By matching	By matching	By matching	By matching	By MS/MS	By MS/MS		By matching	By matching	By matching
P43307	Translocon-associated protein subunit alpha	SSR1	By matching	By matching	By matching			By MS/MS
P43487	Ran-specific GTPase-activating protein	RANBP1	By matching		By matching	By MS/MS			By matching	By matching	By matching		By matching		By matching	By matching	By MS/MS	By matching
P43686	26S protease regulatory subunit 6B	PSMC4	By matching				By MS/MS
P45880	Voltage-dependent anion-selective channel protein 2	VDAC2	By MS/MS	By MS/MS	By MS/MS	By MS/MS	By MS/MS	By MS/MS		By matching				By MS/MS				By matching
P46776	60S ribosomal protein L27a	RPL27A	By MS/MS	By MS/MS	By MS/MS	By matching	By matching	By MS/MS	By matching	By matching	By matching	By MS/MS	By matching			By MS/MS	By matching	By MS/MS
P46777	60S ribosomal protein L5	RPL5	By MS/MS	By MS/MS	By MS/MS	By MS/MS	By MS/MS	By MS/MS	By MS/MS	By matching	By matching	By MS/MS	By matching	By matching	By MS/MS	By MS/MS	By MS/MS	By MS/MS
P46778	60S ribosomal protein L21	RPL21	By matching	By matching	By matching	By MS/MS	By MS/MS	By MS/MS	By matching	By MS/MS	By matching	By matching	By MS/MS		By matching	By MS/MS	By matching	By matching
P46779	60S ribosomal protein L28	RPL28								By matching	By matching	By matching	By matching		By matching	By MS/MS	By matching	By matching
P46781	40S ribosomal protein S9	RPS9	By matching	By matching	By matching	By MS/MS	By MS/MS	By MS/MS	By matching		By matching		By MS/MS			By matching	By matching
P46782	40S ribosomal protein S5;40S ribosomal protein S5, N-terminally processed	RPS5	By matching	By MS/MS	By MS/MS	By MS/MS	By MS/MS	By MS/MS	By matching	By matching	By matching	By MS/MS	By matching	By matching	By matching	By MS/MS	By MS/MS	By MS/MS
P46783;Q9NQ39	40S ribosomal protein S10	RPS10	By MS/MS	By MS/MS	By MS/MS	By matching	By matching	By MS/MS	By matching	By MS/MS	By MS/MS	By matching	By matching		By matching	By MS/MS	By MS/MS	By matching
P47756	F-actin-capping protein subunit beta	CAPZB				By MS/MS
P47914	60S ribosomal protein L29	RPL29	By MS/MS	By MS/MS	By MS/MS	By matching	By MS/MS	By matching	By MS/MS	By MS/MS	By matching	By matching	By MS/MS	By matching	By MS/MS	By MS/MS	By MS/MS	By MS/MS
P48047	ATP synthase subunit O, mitochondrial	ATP5O	By matching	By matching	By matching	By MS/MS	By matching	By matching						By MS/MS			By matching
P48643	T-complex protein 1 subunit epsilon	CCT5	By MS/MS	By MS/MS	By MS/MS	By MS/MS	By MS/MS	By MS/MS	By matching	By matching	By MS/MS	By matching	By MS/MS	By matching	By matching	By MS/MS	By MS/MS	By MS/MS
P49321	Nuclear autoantigenic sperm protein	NASP	By matching	By matching	By matching	By MS/MS	By matching	By MS/MS
P49327	Fatty acid synthase;[Acyl-carrier-protein] S-acetyltransferase;[Acyl-carrier-protein] S-malonyltransferase;3-oxoacyl-[acyl-carrier-protein] synthase;3-oxoacyl-[acyl-carrier-protein] reductase;3-hydroxyacyl-[acyl-carrier-protein] dehydratase;Enoyl-[acyl-carrier-protein] reductase;Oleoyl-[acyl-carrier-protein] hydrolase	FASN	By MS/MS	By MS/MS	By MS/MS	By MS/MS	By MS/MS	By MS/MS	By matching	By matching			By matching	By MS/MS		By matching	By matching	By matching
P49368	T-complex protein 1 subunit gamma	CCT3	By MS/MS	By MS/MS	By MS/MS	By MS/MS	By MS/MS	By MS/MS	By matching	By matching	By matching	By MS/MS	By matching	By matching	By matching	By MS/MS	By MS/MS	By MS/MS
P49411	Elongation factor Tu, mitochondrial	TUFM				By matching	By MS/MS	By matching
P49588	Alanine--tRNA ligase, cytoplasmic	AARS	By matching		By matching	By MS/MS	By matching	By MS/MS
P49721	Proteasome subunit beta type-2	PSMB2		By matching	By matching	By MS/MS		By matching						By matching			By matching
P49748	Very long-chain specific acyl-CoA dehydrogenase, mitochondrial	ACADVL												By MS/MS
P49773	Histidine triad nucleotide-binding protein 1	HINT1	By matching	By matching	By matching		By matching	By matching	By matching	By MS/MS	By matching	By MS/MS	By matching	By matching	By matching	By MS/MS	By matching	By matching
P50395;P31150	Rab GDP dissociation inhibitor beta;Rab GDP dissociation inhibitor alpha	GDI2;GDI1	By matching	By matching	By matching	By MS/MS	By MS/MS	By MS/MS	By MS/MS	By matching	By matching	By matching	By MS/MS		By MS/MS	By matching	By MS/MS	By MS/MS
P50454	Serpin H1	SERPINH1	By MS/MS	By MS/MS	By MS/MS	By MS/MS	By MS/MS	By MS/MS	By matching	By matching	By matching	By matching	By matching			By matching	By MS/MS
Q8IZP2;P50502	Putative protein FAM10A4;Hsc70-interacting protein	ST13P4;ST13	By matching	By matching	By matching	By MS/MS	By MS/MS	By MS/MS
P50914	60S ribosomal protein L14	RPL14	By MS/MS	By MS/MS	By MS/MS	By MS/MS	By MS/MS	By MS/MS	By matching	By matching	By matching		By matching		By matching	By matching	By MS/MS	By MS/MS
P50990	T-complex protein 1 subunit theta	CCT8	By MS/MS	By MS/MS	By MS/MS	By MS/MS	By MS/MS	By MS/MS	By matching	By matching	By matching	By matching	By matching		By matching	By MS/MS	By matching	By matching
P50991	T-complex protein 1 subunit delta	CCT4	By matching	By MS/MS	By matching	By matching	By matching	By MS/MS	By matching	By matching	By matching	By MS/MS	By MS/MS		By matching	By MS/MS	By MS/MS	By matching
P51398	28S ribosomal protein S29, mitochondrial	DAP3	By matching	By matching			By MS/MS
P51571	Translocon-associated protein subunit delta	SSR4	By matching	By matching	By matching	By MS/MS	By matching
P51858	Hepatoma-derived growth factor	HDGF	By matching	By MS/MS	By matching	By matching	By matching	By matching	By matching	By matching						By matching	By matching
P52272	Heterogeneous nuclear ribonucleoprotein M	HNRNPM	By MS/MS	By MS/MS	By MS/MS	By MS/MS	By MS/MS	By MS/MS	By MS/MS	By matching	By matching	By MS/MS	By MS/MS	By MS/MS	By matching	By MS/MS	By MS/MS	By MS/MS
P52565	Rho GDP-dissociation inhibitor 1	ARHGDIA				By matching	By MS/MS	By matching	By matching							By matching
P52597	Heterogeneous nuclear ribonucleoprotein F;Heterogeneous nuclear ribonucleoprotein F, N-terminally processed	HNRNPF	By matching	By matching	By MS/MS	By matching	By MS/MS	By matching	By matching	By matching	By matching	By matching		By matching	By matching	By MS/MS	By matching	By matching
P53396	ATP-citrate synthase	ACLY	By matching	By matching	By MS/MS	By MS/MS	By MS/MS	By MS/MS		By matching		By matching
P53999	Activated RNA polymerase II transcriptional coactivator p15	SUB1	By MS/MS	By MS/MS	By MS/MS	By MS/MS	By MS/MS	By MS/MS	By matching	By MS/MS	By matching	By MS/MS	By MS/MS		By MS/MS	By MS/MS	By MS/MS	By MS/MS
P54136	Arginine--tRNA ligase, cytoplasmic	RARS		By matching		By MS/MS
P54577	Tyrosine--tRNA ligase, cytoplasmic;Tyrosine--tRNA ligase, cytoplasmic, N-terminally processed	YARS	By matching	By matching	By matching	By MS/MS	By MS/MS	By MS/MS
P54578	Ubiquitin carboxyl-terminal hydrolase 14	USP14	By matching	By matching	By matching	By MS/MS		By MS/MS		By matching			By matching
P54819	Adenylate kinase 2, mitochondrial;Adenylate kinase 2, mitochondrial, N-terminally processed	AK2	By MS/MS	By matching	By MS/MS	By MS/MS	By MS/MS	By MS/MS	By matching	By matching	By matching	By matching	By matching	By matching	By MS/MS	By MS/MS	By matching	By matching
P54886	Delta-1-pyrroline-5-carboxylate synthase;Glutamate 5-kinase;Gamma-glutamyl phosphate reductase	ALDH18A1					By MS/MS	By MS/MS						By MS/MS
P55060	Exportin-2	CSE1L							By MS/MS	By MS/MS					By MS/MS
P55072	Transitional endoplasmic reticulum ATPase	VCP	By matching	By matching	By MS/MS	By MS/MS	By MS/MS	By MS/MS	By matching	By matching		By MS/MS	By MS/MS		By MS/MS	By MS/MS	By MS/MS	By MS/MS
P55209	Nucleosome assembly protein 1-like 1	NAP1L1	By matching	By matching	By matching	By MS/MS	By MS/MS	By MS/MS	By matching						By matching	By matching	By matching	By MS/MS
P55786	Puromycin-sensitive aminopeptidase	NPEPPS	By matching	By matching	By matching	By matching	By MS/MS	By matching	By matching
P55809	Succinyl-CoA:3-ketoacid coenzyme A transferase 1, mitochondrial	OXCT1				By matching	By matching	By MS/MS						By MS/MS
Q6EEV6;P61956;P55854	Small ubiquitin-related modifier 4;Small ubiquitin-related modifier 2;Small ubiquitin-related modifier 3	SUMO4;SUMO2;SUMO3							By MS/MS								By matching	By matching
P56134	ATP synthase subunit f, mitochondrial	ATP5J2	By matching	By matching	By matching	By MS/MS	By matching	By MS/MS						By MS/MS				By matching
P57088	Transmembrane protein 33	TMEM33		By matching		By MS/MS	By MS/MS	By MS/MS
P58107	Epiplakin	EPPK1				By matching	By MS/MS	By MS/MS
Q99879;Q99877;Q93079;Q5QNW6;P62807;P58876	Histone H2B type 1-M;Histone H2B type 1-N;Histone H2B type 1-H;Histone H2B type 2-F;Histone H2B type 1-C/E/F/G/I;Histone H2B type 1-D	HIST1H2BM;HIST1H2BN;HIST1H2BH;HIST2H2BF;HIST1H2BC;HIST1H2BD	By MS/MS	By MS/MS	By MS/MS	By MS/MS	By MS/MS	By MS/MS	By MS/MS	By MS/MS	By MS/MS	By MS/MS	By MS/MS	By MS/MS	By MS/MS	By MS/MS	By MS/MS	By MS/MS
P60174	Triosephosphate isomerase	TPI1	By MS/MS	By MS/MS	By MS/MS	By MS/MS	By MS/MS	By MS/MS	By MS/MS	By MS/MS	By MS/MS	By MS/MS	By MS/MS	By matching	By MS/MS	By MS/MS	By MS/MS	By MS/MS
P60468	Protein transport protein Sec61 subunit beta	SEC61B			By matching		By MS/MS
P60660;P14649	Myosin light polypeptide 6	MYL6	By MS/MS	By matching	By matching	By MS/MS	By MS/MS	By MS/MS	By matching	By MS/MS	By matching	By matching	By MS/MS	By matching	By MS/MS	By matching	By MS/MS	By MS/MS
P60709;Q6S8J3;Q562R1;A5A3E0;P0CG38;P0CG39;Q9BYX7	Actin, cytoplasmic 1;Actin, cytoplasmic 1, N-terminally processed	ACTB	By MS/MS	By MS/MS	By MS/MS	By MS/MS	By MS/MS	By MS/MS	By MS/MS	By MS/MS	By MS/MS	By MS/MS	By MS/MS	By MS/MS	By MS/MS	By MS/MS	By MS/MS	By MS/MS
P60842	Eukaryotic initiation factor 4A-I	EIF4A1	By MS/MS	By MS/MS	By MS/MS	By MS/MS	By MS/MS	By MS/MS	By matching	By matching	By matching	By MS/MS	By MS/MS	By matching	By MS/MS	By MS/MS	By MS/MS	By MS/MS
P60866	40S ribosomal protein S20	RPS20	By matching		By matching	By MS/MS			By matching	By matching		By matching	By matching		By MS/MS		By matching	By matching
P60903	Protein S100-A10	S100A10	By matching	By matching	By matching		By matching		By matching	By matching	By matching	By matching	By MS/MS			By MS/MS	By MS/MS	By matching
P60953	Cell division control protein 42 homolog	CDC42					By matching							By MS/MS
P61247	40S ribosomal protein S3a	RPS3A	By matching	By matching	By MS/MS	By MS/MS	By MS/MS	By MS/MS
P61254	60S ribosomal protein L26	RPL26	By matching	By matching	By matching		By matching	By MS/MS
P61289	Proteasome activator complex subunit 3	PSME3						By MS/MS	By matching						By matching
P61313	60S ribosomal protein L15	RPL15	By matching	By MS/MS	By matching	By MS/MS	By MS/MS	By MS/MS	By matching	By MS/MS	By MS/MS	By MS/MS	By MS/MS	By MS/MS	By MS/MS	By MS/MS	By MS/MS	By MS/MS
P61353	60S ribosomal protein L27	RPL27	By matching	By matching	By matching	By matching	By matching	By matching	By MS/MS	By MS/MS	By matching	By MS/MS	By matching		By matching	By matching	By MS/MS	By matching
P61513;A6NKH3	60S ribosomal protein L37a;Putative 60S ribosomal protein L37a-like protein	RPL37A;RPL37AP8	By matching			By MS/MS	By MS/MS	By MS/MS
P61604	10 kDa heat shock protein, mitochondrial	HSPE1	By MS/MS	By MS/MS	By MS/MS	By MS/MS	By MS/MS	By MS/MS	By matching	By matching	By MS/MS	By MS/MS		By MS/MS		By matching	By MS/MS	By matching
P61764	Syntaxin-binding protein 1	STXBP1			By matching	By MS/MS
P61927	60S ribosomal protein L37	RPL37	By matching	By matching	By matching	By MS/MS		By MS/MS
P61978	Heterogeneous nuclear ribonucleoprotein K	HNRNPK	By MS/MS	By MS/MS	By MS/MS	By MS/MS	By MS/MS	By MS/MS	By matching	By matching	By matching	By matching	By MS/MS	By MS/MS	By MS/MS	By MS/MS	By MS/MS	By MS/MS
P61981	14-3-3 protein gamma;14-3-3 protein gamma, N-terminally processed	YWHAG	By matching	By matching	By matching	By MS/MS	By MS/MS	By MS/MS	By matching	By MS/MS	By matching	By MS/MS	By MS/MS	By matching	By matching	By matching	By matching	By matching
P62072	Mitochondrial import inner membrane translocase subunit Tim10	TIMM10		By matching			By MS/MS	By MS/MS
P62081	40S ribosomal protein S7	RPS7	By matching	By matching	By matching	By MS/MS	By MS/MS	By MS/MS	By matching	By MS/MS	By MS/MS	By MS/MS	By MS/MS	By MS/MS	By MS/MS	By MS/MS	By MS/MS	By MS/MS
P62241	40S ribosomal protein S8	RPS8	By matching	By MS/MS	By MS/MS	By matching	By MS/MS	By MS/MS	By MS/MS	By MS/MS	By matching	By matching	By matching		By matching	By MS/MS	By MS/MS	By MS/MS
P62244	40S ribosomal protein S15a	RPS15A	By MS/MS	By MS/MS	By matching	By MS/MS	By MS/MS	By matching	By matching	By matching	By matching	By matching	By matching	By matching		By matching	By MS/MS	By matching
P62249	40S ribosomal protein S16	RPS16	By MS/MS	By MS/MS	By matching	By MS/MS	By matching	By MS/MS	By matching	By matching	By MS/MS	By matching	By matching	By matching	By matching	By MS/MS	By matching	By matching
P62258	14-3-3 protein epsilon	YWHAE	By MS/MS	By MS/MS	By MS/MS	By matching	By MS/MS	By MS/MS	By MS/MS	By MS/MS	By matching	By MS/MS	By matching	By matching	By MS/MS	By MS/MS	By MS/MS	By MS/MS
P62263	40S ribosomal protein S14	RPS14	By MS/MS	By MS/MS	By MS/MS	By MS/MS	By MS/MS	By matching	By matching	By MS/MS	By matching	By matching	By matching	By MS/MS	By matching	By MS/MS	By MS/MS	By MS/MS
P62266	40S ribosomal protein S23	RPS23	By matching	By matching	By matching	By MS/MS	By MS/MS	By MS/MS	By matching	By matching	By matching	By matching	By matching	By matching		By MS/MS	By matching	By MS/MS
P62269	40S ribosomal protein S18	RPS18	By MS/MS	By MS/MS	By MS/MS	By matching	By MS/MS	By matching	By matching	By matching	By MS/MS	By matching	By matching			By MS/MS	By MS/MS	By matching
P62273	40S ribosomal protein S29	RPS29				By matching	By matching	By matching	By matching		By matching	By matching	By matching		By matching	By MS/MS	By matching	By MS/MS
P62277	40S ribosomal protein S13	RPS13	By matching	By matching	By matching	By MS/MS	By MS/MS	By MS/MS	By matching	By matching	By matching				By matching	By matching	By matching	By matching
P62280	40S ribosomal protein S11	RPS11	By MS/MS	By MS/MS	By matching	By matching	By MS/MS	By MS/MS	By MS/MS	By MS/MS	By MS/MS	By matching	By matching	By matching	By MS/MS	By MS/MS	By matching	By matching
P62306	Small nuclear ribonucleoprotein F	SNRPF	By matching	By matching	By matching	By matching	By matching	By matching								By matching	By matching	By MS/MS
P62314	Small nuclear ribonucleoprotein Sm D1	SNRPD1	By matching	By matching	By matching	By MS/MS	By MS/MS	By MS/MS								By matching	By matching	By matching
P62316	Small nuclear ribonucleoprotein Sm D2	SNRPD2			By matching		By matching		By matching	By matching	By matching	By matching		By matching	By matching	By MS/MS		By MS/MS
P62328	Thymosin beta-4;Hematopoietic system regulatory peptide	TMSB4X	By MS/MS	By matching	By matching	By MS/MS	By matching	By MS/MS	By MS/MS	By MS/MS	By MS/MS	By matching	By MS/MS	By matching	By MS/MS	By MS/MS	By matching	By MS/MS
P62424	60S ribosomal protein L7a	RPL7A	By matching	By MS/MS	By matching	By matching	By MS/MS	By MS/MS	By MS/MS	By MS/MS	By matching	By MS/MS	By matching	By matching	By matching	By MS/MS	By matching	By matching
P62701;P22090;Q8TD47	40S ribosomal protein S4, X isoform	RPS4X	By MS/MS	By MS/MS	By MS/MS	By MS/MS	By matching	By matching	By matching	By MS/MS	By matching	By matching	By MS/MS		By MS/MS	By MS/MS	By MS/MS	By matching
P67775;P62714	Serine/threonine-protein phosphatase 2A catalytic subunit alpha isoform;Serine/threonine-protein phosphatase 2A catalytic subunit beta isoform	PPP2CA;PPP2CB						By MS/MS			By matching		By matching
P62750	60S ribosomal protein L23a	RPL23A	By MS/MS	By MS/MS	By MS/MS	By MS/MS	By MS/MS	By MS/MS	By MS/MS	By matching	By matching	By matching	By MS/MS	By matching	By MS/MS	By MS/MS	By MS/MS	By MS/MS
P62753	40S ribosomal protein S6	RPS6	By MS/MS	By MS/MS	By MS/MS	By MS/MS	By MS/MS	By MS/MS	By MS/MS	By MS/MS	By matching	By MS/MS	By matching	By matching	By matching	By MS/MS	By matching	By matching
P62805	Histone H4	HIST1H4A	By MS/MS	By MS/MS	By MS/MS	By MS/MS	By MS/MS	By MS/MS	By MS/MS	By MS/MS	By MS/MS	By MS/MS	By MS/MS	By MS/MS	By MS/MS	By MS/MS	By MS/MS	By MS/MS
P62820	Ras-related protein Rab-1A	RAB1A	By matching	By matching	By matching	By MS/MS		By MS/MS								By matching		By matching
P62826	GTP-binding nuclear protein Ran	RAN	By MS/MS	By MS/MS	By MS/MS	By MS/MS	By MS/MS	By MS/MS	By matching	By MS/MS	By MS/MS	By matching	By MS/MS	By matching	By matching	By MS/MS	By matching	By MS/MS
P62841	40S ribosomal protein S15	RPS15	By matching	By matching	By matching	By MS/MS	By MS/MS	By MS/MS	By matching	By matching	By matching	By matching	By MS/MS		By matching	By matching	By MS/MS	By MS/MS
P62847	40S ribosomal protein S24	RPS24	By MS/MS	By MS/MS	By matching	By MS/MS	By matching	By matching	By matching	By matching	By MS/MS	By matching	By MS/MS	By matching	By matching	By MS/MS	By MS/MS	By MS/MS
P62851	40S ribosomal protein S25	RPS25	By matching	By MS/MS	By MS/MS	By MS/MS	By MS/MS	By MS/MS	By MS/MS	By MS/MS	By matching	By matching	By matching		By matching	By MS/MS	By MS/MS	By MS/MS
Q5JNZ5;P62854	Putative 40S ribosomal protein S26-like 1;40S ribosomal protein S26	RPS26P11;RPS26	By matching	By matching	By matching	By MS/MS	By MS/MS	By MS/MS					By matching					By MS/MS
P62857	40S ribosomal protein S28	RPS28	By matching	By matching	By matching	By matching	By matching	By matching	By MS/MS	By matching	By matching	By matching	By matching		By matching	By MS/MS	By matching	By MS/MS
P62861	40S ribosomal protein S30	FAU	By MS/MS	By MS/MS	By MS/MS	By MS/MS	By MS/MS	By MS/MS	By matching	By MS/MS	By matching	By MS/MS	By matching		By matching	By MS/MS	By MS/MS	By MS/MS
Q9HAV0;P62879;P62873	Guanine nucleotide-binding protein subunit beta-4;Guanine nucleotide-binding protein G(I)/G(S)/G(T) subunit beta-2;Guanine nucleotide-binding protein G(I)/G(S)/G(T) subunit beta-1	GNB4;GNB2;GNB1	By matching	By matching	By matching		By MS/MS	By MS/MS
P62888	60S ribosomal protein L30	RPL30	By matching	By matching	By matching	By MS/MS	By MS/MS	By MS/MS	By matching	By matching		By MS/MS				By matching	By matching	By matching
Q59GN2;P62891	Putative 60S ribosomal protein L39-like 5;60S ribosomal protein L39	RPL39P5;RPL39	By MS/MS	By MS/MS	By MS/MS	By matching	By matching	By MS/MS	By matching	By matching							By matching	By matching
P62899	60S ribosomal protein L31	RPL31	By MS/MS	By MS/MS	By MS/MS	By matching		By matching	By MS/MS	By MS/MS		By MS/MS	By MS/MS	By matching	By MS/MS	By MS/MS	By MS/MS	By MS/MS
P62906	60S ribosomal protein L10a	RPL10A	By MS/MS	By MS/MS	By MS/MS	By matching	By MS/MS	By MS/MS	By matching	By matching	By matching	By matching	By matching	By MS/MS	By matching	By matching	By MS/MS	By matching
P62910	60S ribosomal protein L32	RPL32	By matching	By matching	By matching	By MS/MS	By MS/MS	By MS/MS	By matching	By matching	By matching	By matching	By matching	By matching	By MS/MS	By matching	By MS/MS	By MS/MS
P62913	60S ribosomal protein L11	RPL11	By MS/MS	By MS/MS	By MS/MS	By MS/MS	By MS/MS	By MS/MS	By matching	By MS/MS	By MS/MS	By matching	By matching		By matching	By matching	By matching	By matching
P62917	60S ribosomal protein L8	RPL8	By matching	By MS/MS	By matching	By MS/MS	By MS/MS	By MS/MS	By MS/MS	By MS/MS		By matching			By MS/MS	By MS/MS	By matching	By matching
P62937;Q9Y536;P0DN37;P0DN26;A0A0B4J2A2;A0A075B759;F5H284	Peptidyl-prolyl cis-trans isomerase A;Peptidyl-prolyl cis-trans isomerase A, N-terminally processed	PPIA	By MS/MS	By MS/MS	By MS/MS	By MS/MS	By MS/MS	By MS/MS	By MS/MS	By MS/MS	By MS/MS	By MS/MS	By MS/MS	By matching	By MS/MS	By MS/MS	By MS/MS	By MS/MS
P62979;P62987;P0CG47;P0CG48	Ubiquitin-40S ribosomal protein S27a;Ubiquitin;40S ribosomal protein S27a;Ubiquitin-60S ribosomal protein L40;Ubiquitin;60S ribosomal protein L40;Polyubiquitin-B;Ubiquitin;Polyubiquitin-C;Ubiquitin	RPS27A;UBA52;UBB;UBC	By MS/MS	By MS/MS	By MS/MS	By MS/MS	By MS/MS	By MS/MS	By matching	By MS/MS	By MS/MS	By matching	By matching	By MS/MS		By MS/MS	By matching
P63104;Q04917	14-3-3 protein zeta/delta	YWHAZ	By MS/MS	By MS/MS	By MS/MS	By MS/MS	By MS/MS	By MS/MS	By MS/MS	By MS/MS	By MS/MS	By MS/MS	By MS/MS	By matching	By MS/MS	By MS/MS	By MS/MS	By MS/MS
P63173	60S ribosomal protein L38	RPL38	By MS/MS	By MS/MS	By matching	By matching	By MS/MS	By matching	By matching	By matching					By matching	By matching	By matching	By matching
P63220	40S ribosomal protein S21	RPS21				By matching	By matching	By matching	By matching	By matching	By matching	By matching		By matching	By MS/MS	By matching	By matching	By matching
P63241;Q9GZV4;Q6IS14	Eukaryotic translation initiation factor 5A-1;Eukaryotic translation initiation factor 5A-2;Eukaryotic translation initiation factor 5A-1-like	EIF5A;EIF5A2;EIF5AL1	By MS/MS	By MS/MS	By MS/MS	By MS/MS	By MS/MS	By MS/MS	By MS/MS	By MS/MS		By MS/MS	By MS/MS	By MS/MS	By MS/MS	By matching	By MS/MS	By MS/MS
P63244	Guanine nucleotide-binding protein subunit beta-2-like 1;Guanine nucleotide-binding protein subunit beta-2-like 1, N-terminally processed	GNB2L1	By matching	By matching	By matching			By matching	By matching	By MS/MS			By matching	By matching		By matching	By matching
P63261	Actin, cytoplasmic 2;Actin, cytoplasmic 2, N-terminally processed	ACTG1	By MS/MS	By MS/MS	By MS/MS	By MS/MS	By MS/MS	By MS/MS	By MS/MS	By MS/MS	By MS/MS	By MS/MS	By MS/MS	By matching	By MS/MS	By MS/MS	By MS/MS	By MS/MS
P63313	Thymosin beta-10	TMSB10	By MS/MS	By MS/MS	By MS/MS	By MS/MS	By MS/MS	By MS/MS	By MS/MS	By MS/MS	By MS/MS	By MS/MS	By MS/MS	By matching	By MS/MS	By MS/MS	By MS/MS	By MS/MS
P67809;P16989	Nuclease-sensitive element-binding protein 1	YBX1	By MS/MS	By MS/MS	By matching	By matching	By matching	By MS/MS	By matching			By matching		By matching	By matching	By matching	By matching	By MS/MS
P68032;P68133;P62736;P63267	Actin, alpha cardiac muscle 1;Actin, alpha skeletal muscle;Actin, aortic smooth muscle;Actin, gamma-enteric smooth muscle	ACTC1;ACTA1;ACTA2;ACTG2	By matching	By matching	By matching	By matching	By MS/MS	By matching	By MS/MS	By MS/MS	By MS/MS	By MS/MS	By MS/MS	By MS/MS	By MS/MS	By MS/MS	By MS/MS	By MS/MS
Q5VTE0;P68104;Q05639	Putative elongation factor 1-alpha-like 3;Elongation factor 1-alpha 1	EEF1A1P5;EEF1A1	By MS/MS	By MS/MS	By MS/MS	By MS/MS	By MS/MS	By MS/MS	By MS/MS	By MS/MS	By MS/MS	By MS/MS	By MS/MS	By MS/MS	By MS/MS	By MS/MS	By MS/MS	By MS/MS
P68363;P68366;A6NHL2;Q9H853	Tubulin alpha-1B chain;Tubulin alpha-4A chain	TUBA1B;TUBA4A	By MS/MS	By MS/MS	By MS/MS	By MS/MS	By MS/MS	By MS/MS	By MS/MS	By MS/MS	By MS/MS	By matching	By MS/MS	By MS/MS	By MS/MS	By MS/MS	By MS/MS	By MS/MS
P68371;P04350;Q3ZCM7	Tubulin beta-4B chain;Tubulin beta-4A chain	TUBB4B;TUBB4A	By MS/MS	By MS/MS	By MS/MS	By MS/MS	By MS/MS	By MS/MS	By matching	By matching	By MS/MS	By matching	By matching	By matching	By matching	By MS/MS	By matching	By MS/MS
P78330	Phosphoserine phosphatase	PSPH	By matching	By matching		By matching	By MS/MS	By MS/MS
P78344	Eukaryotic translation initiation factor 4 gamma 2	EIF4G2	By matching	By matching	By matching	By MS/MS	By MS/MS	By MS/MS
P78371	T-complex protein 1 subunit beta	CCT2	By MS/MS	By MS/MS	By MS/MS	By matching	By MS/MS	By MS/MS	By matching	By matching	By MS/MS	By MS/MS	By matching		By matching	By MS/MS	By MS/MS	By matching
P78527	DNA-dependent protein kinase catalytic subunit	PRKDC	By matching	By matching	By matching	By matching	By MS/MS	By MS/MS					By matching	By MS/MS		By matching
P80723	Brain acid soluble protein 1	BASP1	By MS/MS	By MS/MS	By matching	By MS/MS	By MS/MS	By MS/MS	By MS/MS	By MS/MS	By MS/MS	By matching	By MS/MS	By MS/MS	By MS/MS	By MS/MS	By MS/MS	By MS/MS
P81605	Dermcidin;Survival-promoting peptide;DCD-1	DCD	By matching	By matching	By matching	By matching	By matching	By MS/MS	By MS/MS	By MS/MS	By matching	By matching	By MS/MS	By MS/MS	By MS/MS	By MS/MS	By MS/MS	By MS/MS
P83731	60S ribosomal protein L24	RPL24	By matching	By MS/MS	By MS/MS	By MS/MS	By MS/MS	By MS/MS	By MS/MS	By MS/MS	By matching	By matching	By matching	By matching	By matching	By matching	By matching	By matching
P83881;Q969Q0	60S ribosomal protein L36a	RPL36A	By matching	By MS/MS	By matching	By MS/MS	By MS/MS	By MS/MS	By matching							By matching
P84090	Enhancer of rudimentary homolog	ERH	By matching	By matching	By matching		By matching	By matching	By matching	By matching	By matching	By matching		By MS/MS		By MS/MS	By matching	By matching
P84098	60S ribosomal protein L19	RPL19	By MS/MS	By matching	By MS/MS	By MS/MS	By MS/MS	By matching	By matching	By matching	By matching	By MS/MS	By matching	By matching	By matching	By MS/MS	By MS/MS	By MS/MS
P84103	Serine/arginine-rich splicing factor 3	SRSF3	By matching	By matching	By matching	By MS/MS	By matching	By matching	By MS/MS	By matching	By matching	By MS/MS	By matching	By matching	By MS/MS	By MS/MS	By matching	By matching
P84243;Q6NXT2	Histone H3.3;Histone H3.3C	H3F3A;H3F3C	By matching	By matching	By matching	By matching	By matching	By matching	By matching	By matching	By matching	By matching	By matching	By matching	By matching	By matching	By MS/MS	By MS/MS
Q00325	Phosphate carrier protein, mitochondrial	SLC25A3	By matching	By matching	By matching	By MS/MS	By MS/MS	By MS/MS		By matching	By matching			By MS/MS				By matching
Q00610	Clathrin heavy chain 1	CLTC	By MS/MS	By MS/MS	By MS/MS	By matching	By matching			By matching	By matching	By MS/MS	By matching	By MS/MS		By matching	By matching	By matching
Q00653	Nuclear factor NF-kappa-B p100 subunit;Nuclear factor NF-kappa-B p52 subunit	NFKB2		By matching			By MS/MS											By matching
Q00839	Heterogeneous nuclear ribonucleoprotein U	HNRNPU	By MS/MS	By MS/MS	By MS/MS	By MS/MS	By MS/MS	By MS/MS	By matching	By MS/MS	By matching	By MS/MS	By MS/MS	By MS/MS	By MS/MS	By MS/MS	By MS/MS	By MS/MS
Q01082	Spectrin beta chain, non-erythrocytic 1	SPTBN1						By MS/MS								By matching		By matching
Q01105;P0DME0	Protein SET	SET	By matching	By matching	By MS/MS	By MS/MS	By MS/MS	By MS/MS	By matching	By matching	By MS/MS	By MS/MS	By MS/MS		By MS/MS	By MS/MS	By MS/MS	By MS/MS
Q01130	Serine/arginine-rich splicing factor 2	SRSF2	By MS/MS		By MS/MS	By MS/MS	By MS/MS	By MS/MS									By matching	By matching
Q01518	Adenylyl cyclase-associated protein 1	CAP1		By matching		By matching	By MS/MS	By MS/MS
Q01650;Q9UM01;Q92536	Large neutral amino acids transporter small subunit 1	SLC7A5	By MS/MS	By matching	By matching	By MS/MS	By matching	By MS/MS	By MS/MS	By MS/MS	By MS/MS	By MS/MS	By MS/MS		By MS/MS	By MS/MS	By MS/MS	By MS/MS
Q02543	60S ribosomal protein L18a	RPL18A		By matching		By MS/MS	By MS/MS	By MS/MS		By MS/MS					By matching		By MS/MS
Q02790	Peptidyl-prolyl cis-trans isomerase FKBP4;Peptidyl-prolyl cis-trans isomerase FKBP4, N-terminally processed	FKBP4	By matching	By matching	By matching	By MS/MS	By matching	By matching	By matching	By MS/MS						By matching		By matching
Q02878	60S ribosomal protein L6	RPL6	By MS/MS	By MS/MS	By MS/MS	By MS/MS	By MS/MS	By MS/MS	By matching	By MS/MS	By matching	By MS/MS	By MS/MS	By MS/MS	By MS/MS	By MS/MS	By MS/MS	By matching
Q04637	Eukaryotic translation initiation factor 4 gamma 1	EIF4G1	By matching	By matching	By matching	By MS/MS	By MS/MS	By MS/MS	By matching		By matching	By matching	By matching		By matching	By matching	By matching	By matching
Q04837	Single-stranded DNA-binding protein, mitochondrial	SSBP1	By MS/MS	By MS/MS	By MS/MS	By MS/MS	By MS/MS	By MS/MS			By MS/MS			By MS/MS			By matching	By matching
Q04941	Proteolipid protein 2	PLP2						By MS/MS					By matching	By matching			By matching	By matching
Q06830	Peroxiredoxin-1	PRDX1	By MS/MS	By MS/MS	By MS/MS	By matching	By MS/MS	By MS/MS	By MS/MS	By MS/MS	By MS/MS	By MS/MS	By MS/MS	By MS/MS	By MS/MS	By MS/MS	By MS/MS	By MS/MS
Q07020	60S ribosomal protein L18	RPL18	By MS/MS	By MS/MS	By MS/MS	By MS/MS	By MS/MS	By MS/MS	By matching	By matching	By matching	By matching	By matching	By matching	By MS/MS	By MS/MS	By MS/MS	By MS/MS
Q07021	Complement component 1 Q subcomponent-binding protein, mitochondrial	C1QBP	By MS/MS	By MS/MS	By MS/MS	By MS/MS	By MS/MS	By MS/MS
Q07065	Cytoskeleton-associated protein 4	CKAP4				By MS/MS	By MS/MS	By matching									By matching
Q07666;Q5VWX1;O75525	KH domain-containing, RNA-binding, signal transduction-associated protein 1	KHDRBS1	By matching	By MS/MS	By matching	By MS/MS	By MS/MS	By MS/MS	By matching			By matching		By matching	By MS/MS	By matching	By matching	By matching
Q07955	Serine/arginine-rich splicing factor 1	SRSF1		By matching	By matching	By matching	By MS/MS	By MS/MS	By matching	By matching		By matching	By matching	By MS/MS		By MS/MS	By matching	By MS/MS
Q08211	ATP-dependent RNA helicase A	DHX9	By matching	By matching	By matching	By MS/MS	By MS/MS	By MS/MS				By matching		By MS/MS		By matching		By matching
Q08J23	tRNA (cytosine(34)-C(5))-methyltransferase	NSUN2	By matching	By matching	By matching	By MS/MS	By matching	By MS/MS		By matching		By matching				By matching	By matching	By matching
Q09666	Neuroblast differentiation-associated protein AHNAK	AHNAK	By matching	By matching	By matching	By MS/MS	By MS/MS	By MS/MS		By matching	By matching	By matching				By matching		By matching
Q10471	Polypeptide N-acetylgalactosaminyltransferase 2;Polypeptide N-acetylgalactosaminyltransferase 2 soluble form	GALNT2	By matching	By matching	By matching	By MS/MS	By MS/MS	By matching					By matching	By MS/MS
Q12797	Aspartyl/asparaginyl beta-hydroxylase	ASPH	By matching	By matching	By matching	By MS/MS	By MS/MS	By MS/MS
Q12849	G-rich sequence factor 1	GRSF1	By matching	By matching	By matching	By MS/MS	By MS/MS	By MS/MS
Q12906	Interleukin enhancer-binding factor 3	ILF3	By matching	By matching	By matching	By MS/MS	By matching	By MS/MS	By matching					By MS/MS	By matching	By MS/MS		By matching
Q12965	Unconventional myosin-Ie	MYO1E	By matching		By matching	By matching	By MS/MS	By matching
Q13162	Peroxiredoxin-4	PRDX4	By matching	By matching	By matching	By MS/MS	By matching	By MS/MS	By matching	By matching	By matching	By matching	By matching	By matching	By matching	By matching	By matching	By matching
Q13200	26S proteasome non-ATPase regulatory subunit 2	PSMD2	By matching	By matching		By MS/MS	By matching	By matching									By matching
Q13263	Transcription intermediary factor 1-beta	TRIM28					By matching	By MS/MS
Q13435	Splicing factor 3B subunit 2	SF3B2	By matching	By matching	By matching	By MS/MS	By matching	By MS/MS
Q13442	28 kDa heat- and acid-stable phosphoprotein	PDAP1				By MS/MS	By MS/MS	By MS/MS
Q13509	Tubulin beta-3 chain	TUBB3	By matching	By matching	By matching	By matching	By matching	By MS/MS	By matching	By matching	By matching	By matching	By matching	By matching	By matching	By matching	By matching	By matching
Q13724	Mannosyl-oligosaccharide glucosidase	MOGS	By matching			By matching	By MS/MS	By MS/MS
Q13838	Spliceosome RNA helicase DDX39B	DDX39B	By matching	By matching	By matching	By MS/MS	By MS/MS	By MS/MS
Q9BVA1;Q13885	Tubulin beta-2B chain;Tubulin beta-2A chain	TUBB2B;TUBB2A	By MS/MS	By MS/MS	By matching	By matching	By matching	By matching	By matching	By MS/MS	By MS/MS	By matching	By matching	By matching	By matching	By matching	By matching	By matching
Q14019	Coactosin-like protein	COTL1	By matching		By matching		By matching	By matching				By matching		By matching		By matching	By MS/MS	By matching
Q14103	Heterogeneous nuclear ribonucleoprotein D0	HNRNPD	By matching	By matching	By matching	By matching	By MS/MS	By matching				By matching				By MS/MS		By matching
Q14152	Eukaryotic translation initiation factor 3 subunit A	EIF3A					By MS/MS	By MS/MS
Q14204	Cytoplasmic dynein 1 heavy chain 1	DYNC1H1				By MS/MS											By matching
Q14257	Reticulocalbin-2	RCN2				By matching	By MS/MS	By matching
Q14697	Neutral alpha-glucosidase AB	GANAB	By matching	By matching	By matching	By matching	By MS/MS	By matching						By MS/MS				By matching
Q14764	Major vault protein	MVP	By matching	By matching	By matching	By MS/MS
Q14847	LIM and SH3 domain protein 1	LASP1				By MS/MS	By matching	By matching
Q14974	Importin subunit beta-1	KPNB1	By MS/MS	By matching	By MS/MS	By MS/MS	By MS/MS	By MS/MS	By matching	By matching	By matching	By matching	By matching	By MS/MS	By matching	By MS/MS	By MS/MS	By MS/MS
Q14978	Nucleolar and coiled-body phosphoprotein 1	NOLC1	By matching	By matching	By matching	By MS/MS	By MS/MS	By MS/MS
Q15050	Ribosome biogenesis regulatory protein homolog	RRS1	By matching	By matching	By matching	By MS/MS	By MS/MS
Q15056	Eukaryotic translation initiation factor 4H	EIF4H			By matching	By matching	By matching		By matching	By matching	By matching	By matching				By MS/MS	By matching	By matching
Q15084	Protein disulfide-isomerase A6	PDIA6	By MS/MS	By MS/MS	By MS/MS	By MS/MS	By MS/MS	By MS/MS	By matching		By matching		By matching	By MS/MS	By matching	By matching	By matching	By matching
Q15149	Plectin	PLEC	By matching	By matching	By matching	By MS/MS	By MS/MS	By MS/MS		By matching				By MS/MS		By matching	By MS/MS	By matching
Q15181	Inorganic pyrophosphatase	PPA1		By MS/MS	By MS/MS	By matching	By MS/MS	By MS/MS		By MS/MS	By matching	By matching			By matching		By MS/MS	By matching
Q15233	Non-POU domain-containing octamer-binding protein	NONO	By matching	By matching	By MS/MS	By MS/MS	By matching	By MS/MS	By matching	By matching	By matching	By matching	By matching	By MS/MS	By MS/MS	By matching	By MS/MS	By MS/MS
Q15286	Ras-related protein Rab-35	RAB35	By matching		By matching		By MS/MS
Q15363	Transmembrane emp24 domain-containing protein 2	TMED2	By matching			By matching	By MS/MS							By MS/MS
Q15365;P57721	Poly(rC)-binding protein 1;Poly(rC)-binding protein 3	PCBP1;PCBP3	By MS/MS	By matching	By MS/MS	By MS/MS	By MS/MS	By MS/MS	By matching	By matching	By matching	By matching	By matching	By matching	By MS/MS	By MS/MS	By MS/MS	By MS/MS
Q15366	Poly(rC)-binding protein 2	PCBP2	By matching	By matching	By matching	By MS/MS	By matching	By matching	By matching	By matching	By matching	By matching	By matching	By matching	By matching	By matching	By MS/MS	By MS/MS
Q15427	Splicing factor 3B subunit 4	SF3B4												By MS/MS		By matching	By matching	By matching
Q15637	Splicing factor 1	SF1	By matching	By matching	By matching	By matching	By MS/MS	By matching		By matching					By matching		By matching	By matching
Q15691	Microtubule-associated protein RP/EB family member 1	MAPRE1	By matching		By matching	By matching	By MS/MS	By MS/MS
Q15843	NEDD8	NEDD8	By matching	By matching	By matching	By MS/MS		By MS/MS		By matching					By matching	By matching	By MS/MS	By matching
Q16531	DNA damage-binding protein 1	DDB1	By matching	By matching	By matching	By MS/MS	By matching	By matching
Q16630	Cleavage and polyadenylation specificity factor subunit 6	CPSF6		By matching	By matching		By MS/MS
Q16658	Fascin	FSCN1	By matching	By MS/MS	By MS/MS	By matching	By matching	By MS/MS	By matching	By matching	By matching	By MS/MS	By matching		By MS/MS	By MS/MS	By matching	By MS/MS
Q16719	Kynureninase	KYNU		By matching		By MS/MS	By MS/MS	By matching					By matching			By matching	By matching	By matching
Q16740	ATP-dependent Clp protease proteolytic subunit, mitochondrial	CLPP		By matching	By matching			By MS/MS
Q16851	UTP--glucose-1-phosphate uridylyltransferase	UGP2	By matching	By matching	By matching	By MS/MS	By MS/MS
Q16875	6-phosphofructo-2-kinase/fructose-2,6-bisphosphatase 3;6-phosphofructo-2-kinase;Fructose-2,6-bisphosphatase	PFKFB3																By MS/MS
Q2KJY2	Kinesin-like protein KIF26B	KIF26B				By MS/MS	By MS/MS	By MS/MS
Q58FF8	Putative heat shock protein HSP 90-beta 2	HSP90AB2P	By matching	By matching	By matching	By matching	By matching	By matching	By matching	By matching	By matching	By MS/MS	By MS/MS	By matching	By matching	By MS/MS	By MS/MS	By MS/MS
Q6FI13;Q16777	Histone H2A type 2-A;Histone H2A type 2-C	HIST2H2AA3;HIST2H2AC	By matching	By matching	By matching	By matching	By MS/MS	By MS/MS	By MS/MS	By MS/MS	By MS/MS	By MS/MS	By MS/MS	By MS/MS	By MS/MS	By MS/MS	By MS/MS	By MS/MS
Q6NZI2	Polymerase I and transcript release factor	PTRF		By matching				By MS/MS
Q71DI3;Q16695;P68431	Histone H3.2;Histone H3.1t;Histone H3.1	HIST2H3A;HIST3H3;HIST1H3A	By MS/MS	By MS/MS	By MS/MS	By MS/MS	By MS/MS	By MS/MS	By MS/MS	By MS/MS	By MS/MS	By MS/MS	By MS/MS	By MS/MS	By MS/MS	By MS/MS	By MS/MS	By MS/MS
Q7KZF4	Staphylococcal nuclease domain-containing protein 1	SND1	By matching	By matching	By MS/MS	By MS/MS	By matching	By MS/MS				By matching			By matching	By matching	By matching	By matching
Q7L1Q6	Basic leucine zipper and W2 domain-containing protein 1	BZW1	By matching	By matching	By matching	By matching	By MS/MS	By MS/MS				By matching
Q86V81	THO complex subunit 4	ALYREF	By matching	By MS/MS	By MS/MS	By MS/MS	By MS/MS	By MS/MS	By matching	By matching		By MS/MS	By MS/MS	By matching	By MS/MS	By matching	By MS/MS	By MS/MS
Q86VP6	Cullin-associated NEDD8-dissociated protein 1	CAND1												By MS/MS
Q8IYT4	Katanin p60 ATPase-containing subunit A-like 2	KATNAL2	By MS/MS	By MS/MS	By MS/MS	By matching	By matching	By matching				By matching	By matching			By matching	By matching	By matching
Q8NC51	Plasminogen activator inhibitor 1 RNA-binding protein	SERBP1	By MS/MS	By MS/MS	By MS/MS	By MS/MS	By MS/MS	By MS/MS	By matching	By MS/MS		By MS/MS		By matching	By MS/MS	By MS/MS	By matching	By MS/MS
Q8NF37	Lysophosphatidylcholine acyltransferase 1	LPCAT1				By matching	By MS/MS	By MS/MS
Q8WUM4	Programmed cell death 6-interacting protein	PDCD6IP	By matching	By matching	By matching	By MS/MS	By MS/MS	By MS/MS
Q92616	Translational activator GCN1	GCN1L1				By MS/MS	By MS/MS	By MS/MS
Q92688	Acidic leucine-rich nuclear phosphoprotein 32 family member B	ANP32B			By matching	By matching		By matching	By matching				By matching	By MS/MS			By MS/MS	By matching
Q92841	Probable ATP-dependent RNA helicase DDX17	DDX17				By matching	By matching	By matching						By MS/MS			By matching
Q93045	Stathmin-2	STMN2	By matching		By matching	By matching	By matching	By matching	By matching	By matching	By matching	By matching			By MS/MS	By MS/MS		By matching
Q93077	Histone H2A type 1-C	HIST1H2AC	By matching	By matching	By matching	By MS/MS	By MS/MS	By MS/MS	By MS/MS	By MS/MS	By matching	By matching	By MS/MS	By matching	By MS/MS	By MS/MS	By MS/MS	By matching
Q96AE4;Q96I24;Q92945	Far upstream element-binding protein 1;Far upstream element-binding protein 3;Far upstream element-binding protein 2	FUBP1;FUBP3;KHSRP	By matching		By matching	By MS/MS	By MS/MS	By MS/MS		By matching	By matching	By matching	By matching	By matching	By MS/MS	By MS/MS		By matching
Q96AG4	Leucine-rich repeat-containing protein 59	LRRC59	By matching	By matching	By matching	By MS/MS	By MS/MS	By MS/MS
Q96AY3	Peptidyl-prolyl cis-trans isomerase FKBP10	FKBP10												By MS/MS
Q96C90	Protein phosphatase 1 regulatory subunit 14B	PPP1R14B	By matching		By matching	By matching	By matching	By MS/MS										By matching
Q96IX5	Up-regulated during skeletal muscle growth protein 5	USMG5	By matching			By MS/MS	By matching	By matching
Q96PK6	RNA-binding protein 14	RBM14	By matching	By MS/MS	By matching	By MS/MS	By matching	By MS/MS		By matching				By matching	By matching	By matching		By matching
Q99497	Protein deglycase DJ-1	PARK7	By matching	By matching	By matching	By matching	By matching	By matching	By matching	By matching	By matching	By matching	By matching		By MS/MS	By matching	By matching	By MS/MS
Q99536	Synaptic vesicle membrane protein VAT-1 homolog	VAT1				By matching	By matching	By matching		By matching		By matching				By matching	By MS/MS	By matching
Q99583	Max-binding protein MNT	MNT											By MS/MS	By matching
Q99623	Prohibitin-2	PHB2	By matching	By matching		By MS/MS	By MS/MS	By MS/MS						By MS/MS			By matching	By matching
Q99714	3-hydroxyacyl-CoA dehydrogenase type-2	HSD17B10	By matching	By matching	By matching		By MS/MS											By matching
Q99729	Heterogeneous nuclear ribonucleoprotein A/B	HNRNPAB	By matching	By matching	By matching	By MS/MS	By MS/MS	By MS/MS	By matching					By MS/MS		By MS/MS	By matching	By matching
Q99832	T-complex protein 1 subunit eta	CCT7	By matching	By matching	By matching	By MS/MS	By MS/MS	By matching	By matching	By matching	By matching	By MS/MS	By MS/MS	By MS/MS		By matching	By matching	By matching
Q99880	Histone H2B type 1-L	HIST1H2BL	By matching	By matching	By matching	By MS/MS	By MS/MS	By MS/MS	By matching	By matching	By matching	By matching	By matching	By matching	By matching	By matching	By matching	By matching
Q9BQE3;Q9NY65	Tubulin alpha-1C chain	TUBA1C	By matching	By matching	By matching	By matching	By MS/MS	By matching	By matching	By matching	By matching	By matching	By matching	By matching	By matching	By MS/MS	By matching	By matching
Q9BVC6	Transmembrane protein 109	TMEM109				By MS/MS	By MS/MS
Q9C037	E3 ubiquitin-protein ligase TRIM4	TRIM4	By matching	By matching	By matching	By matching			By matching	By MS/MS	By matching		By matching	By matching	By matching	By MS/MS	By MS/MS	By matching
Q9GZZ8	Extracellular glycoprotein lacritin	LACRT											By MS/MS					By matching
Q9H444	Charged multivesicular body protein 4b	CHMP4B				By MS/MS
Q9HB71	Calcyclin-binding protein	CACYBP	By matching	By matching	By matching	By MS/MS	By MS/MS	By MS/MS	By matching	By matching		By MS/MS			By MS/MS	By MS/MS	By matching	By matching
Q9NP58	ATP-binding cassette sub-family B member 6, mitochondrial	ABCB6														By MS/MS
Q9NQC3	Reticulon-4	RTN4	By matching	By matching	By matching	By MS/MS	By matching		By matching					By matching		By matching	By MS/MS	By matching
Q9NR30;Q9BQ39	Nucleolar RNA helicase 2;ATP-dependent RNA helicase DDX50	DDX21;DDX50	By matching	By matching	By matching	By MS/MS	By matching	By MS/MS								By matching
Q9NR45	Sialic acid synthase	NANS	By matching	By matching	By matching	By matching		By MS/MS								By matching
Q9NX63	MICOS complex subunit MIC19	CHCHD3			By matching	By matching	By MS/MS	By MS/MS
Q9NZM1	Myoferlin	MYOF				By MS/MS	By MS/MS
Q9UDY4	DnaJ homolog subfamily B member 4	DNAJB4				By matching	By MS/MS	By matching									By matching
Q9UHD8	Septin-9	2018-09-09				By MS/MS	By MS/MS	By matching
Q9UI32	Glutaminase liver isoform, mitochondrial	GLS2	By matching	By MS/MS	By MS/MS	By matching	By matching	By matching
Q9UI47	Catenin alpha-3	CTNNA3	By matching	By MS/MS	By matching	By matching	By MS/MS	By matching						By matching
Q9UK76	Hematological and neurological expressed 1 protein;Hematological and neurological expressed 1 protein, N-terminally processed	HN1	By matching	By matching	By matching	By matching		By matching	By matching			By MS/MS				By MS/MS	By matching	By matching
Q9UPX6	UPF0258 protein KIAA1024	KIAA1024				By matching	By MS/MS	By matching
Q9UQ80	Proliferation-associated protein 2G4	PA2G4		By matching	By MS/MS	By MS/MS	By MS/MS	By MS/MS
Q9Y224	UPF0568 protein C14orf166	C14orf166	By matching				By MS/MS
Q9Y265	RuvB-like 1	RUVBL1			By matching	By MS/MS	By matching
Q9Y2V2	Calcium-regulated heat stable protein 1	CARHSP1		By matching		By MS/MS	By MS/MS	By MS/MS
Q9Y2W1	Thyroid hormone receptor-associated protein 3	THRAP3				By matching	By MS/MS	By MS/MS					By matching	By MS/MS		By matching	By matching	By matching
Q9Y2Z0	Suppressor of G2 allele of SKP1 homolog	SUGT1	By MS/MS									By matching					By matching	By matching
Q9Y333	U6 snRNA-associated Sm-like protein LSm2	LSM2						By MS/MS
Q9Y3I0	tRNA-splicing ligase RtcB homolog	RTCB	By matching	By matching	By matching	By MS/MS	By MS/MS	By MS/MS
Q9Y3U8	60S ribosomal protein L36	RPL36	By matching	By matching	By matching	By matching	By MS/MS	By MS/MS			By matching	By matching				By matching	By matching	By MS/MS
Q9Y490;Q9Y4G6	Talin-1;Talin-2	TLN1;TLN2		By matching	By matching								By MS/MS	By matching		By matching	By matching	By MS/MS

## Sheet: GO analysis
	Single Cell 1	Single Cell 2	Single Cell 3	Single Cell 4	Single Cell 5	Single Cell 6	Single Cell 7	Single Cell 8	Single Cell 9	Single Cell 10
Cytoplasm	56.7453	53.5318	52.4728	51.8658	39.4975	27.4192	49.918	53.246	51.723	57.9568
Cytoskeleton	8.91359	8.28647	7.14382	8.27488	4.23259	2.02097	6.67059	7.79029	7.60153	9.3865
Extracellular	1.26024	2.87873	6.76425	0.998112	2.89439	2.95936	1.07894	1.4525	1.84655	2.14186
Mitochondrion	1.86989	2.41921	3.36485	1.4511	2.24786	7.83118	1.65303	1.95757	1.43089	1.55459
Nucleus	30.5449	32.3585	29.5856	37.0129	50.7221	58.1624	40.1855	35.0314	36.8292	28.4367
Others	0.666126	0.525234	0.668698	0.397215	0.405481	1.60693	0.493897	0.522235	0.568816	0.52355
Detail of Others
Endoplasmic reticulum	0.366131	0.350988	0.45	0.145752	0.199288	1.16318	0.185782	0.241016	0.335967	0.288022
Endosome	0	0	0	0	0	0	0	0	0	0.00381977
Golgi apparatus	0.0051784	0	0	0.00432742	0.0107698	0.143431	0	0.0185486	0.00729757	0.0332353
Peroxisome	0.00518075	0.00840464	0	0.00571242	0	0	0	0.00774295	0	0.0018967
Plasma membrane	0.289636	0.165841	0.218698	0.241424	0.195424	0.300315	0.308114	0.254927	0.225551	0.196576

## Sheet: R2
Cell-Cell (correlation coefficients, R2)	1	2	3	4	5	6	7	8	9
1
2	0.82
3	0.69	0.78
4	0.79	0.77	0.7
5	0.68	0.76	0.7	0.68
6	0.28	0.32	0.3	0.25	0.31
7	0.8	0.77	0.64	0.83	0.69	0.29
8	0.87	0.87	0.77	0.84	0.75	0.28	0.82
9	0.81	0.81	0.71	0.78	0.75	0.27	0.77	0.84
10	0.82	0.81	0.7	0.79	0.73	0.26	0.81	0.85	0.92
